# Supplementary material for: Comparison of different fast gas chromatography – mass spectrometry techniques (Cold EI, MS/MS, and HRMS) for the analysis of pyrethroid insecticide residues in food
Source: Royal Society of Chemistry journal article supplement (doi:10.1039/d4ay00858h), 2024-01-01
Supplement: d4ay00858h1.pdf [file d4ay00858h1.pdf]

### Supplemental Information for:

## Comparison of different fast gas chromatography - mass spectrometry techniques (Cold EI, MS/MS, and HRMS) for the analysis of pyrethroid insecticide residues in food

Nicolás Michlig, Aviv Amirav, Benny Neumark, and Steven J. Lehotay \*

\* Contact: Steven.Lehotay@usda.gov

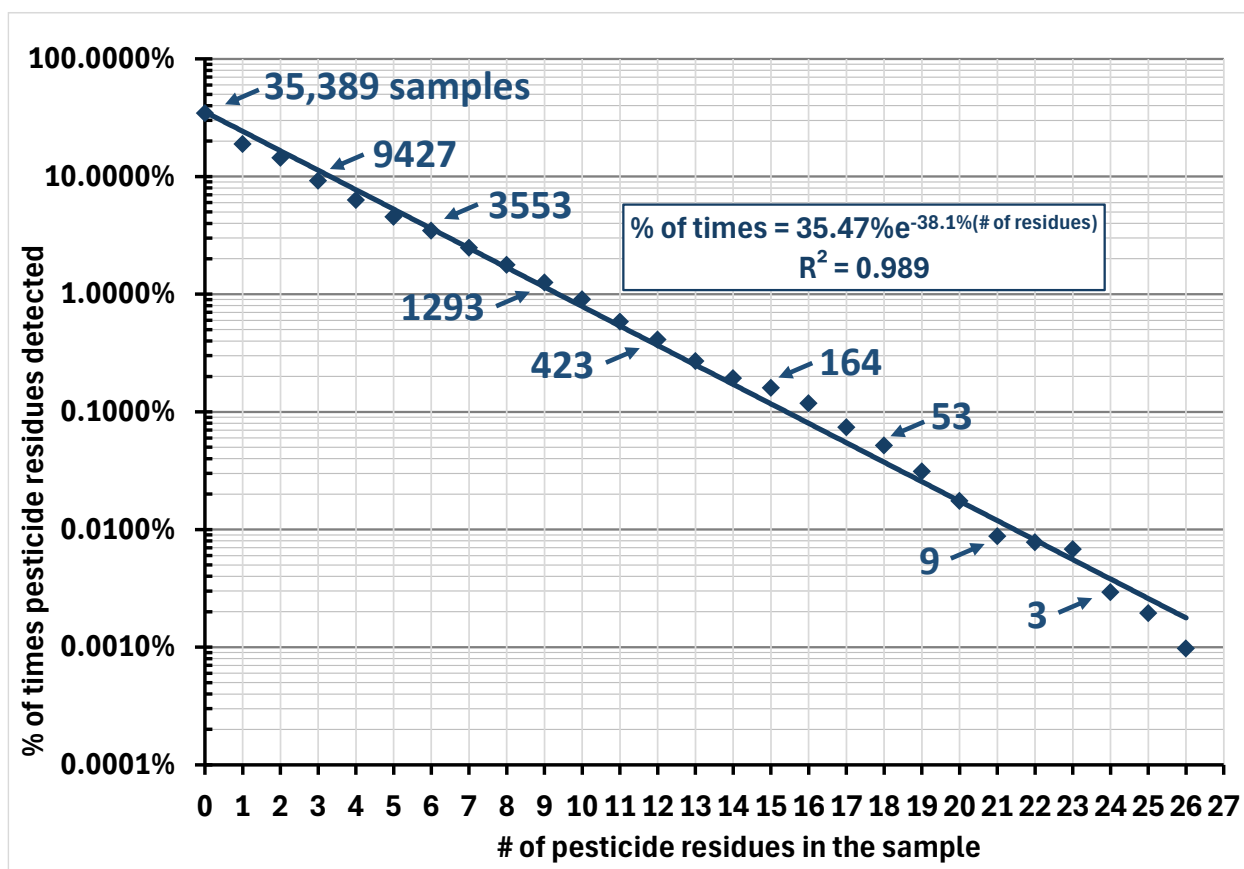

**Figure S1.** The percent (and number) of samples vs. number of different pesticide residues reported in each of 102,336 samples analyzed in the USDA Pesticide Data Program compiled from annual summary reports 2013–2022 (see: [www.ams.usda.gov/datasets/pdp](http://www.ams.usda.gov/datasets/pdp)). Both GC and LC methods were used for analysis, typically using MS/MS for targeted detection and/or confirmation, but the number of false positives is unknown.

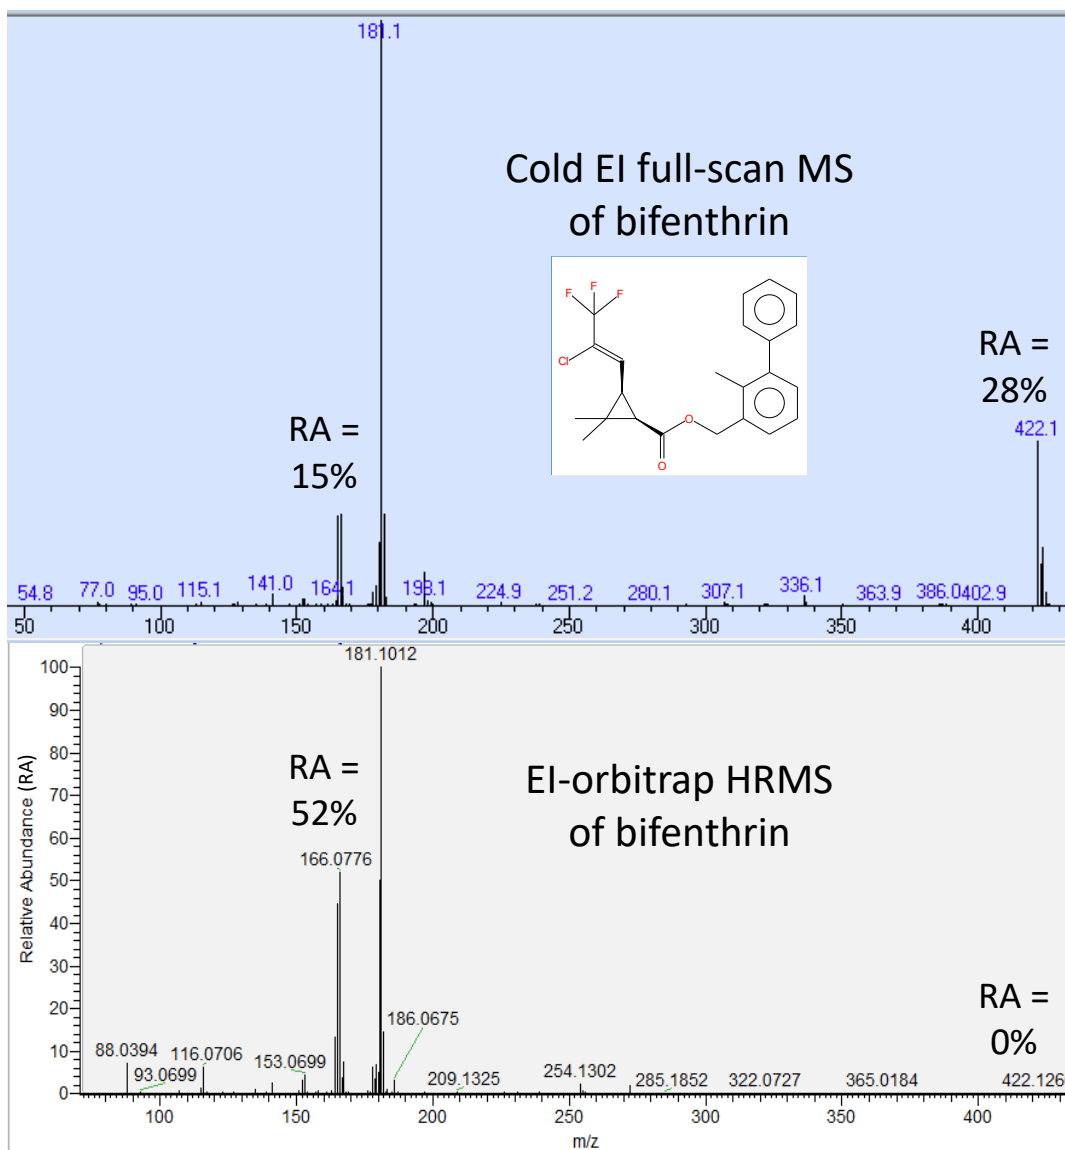

**Figure S2.** Comparison of the full-scan Cold EI and HRMS (orbitrap) spectra of bifenthrin. Note the shift of ions to higher masses, including enhanced  $M^+$  with 28% relative abundance, in Cold EI compared to standard EI.

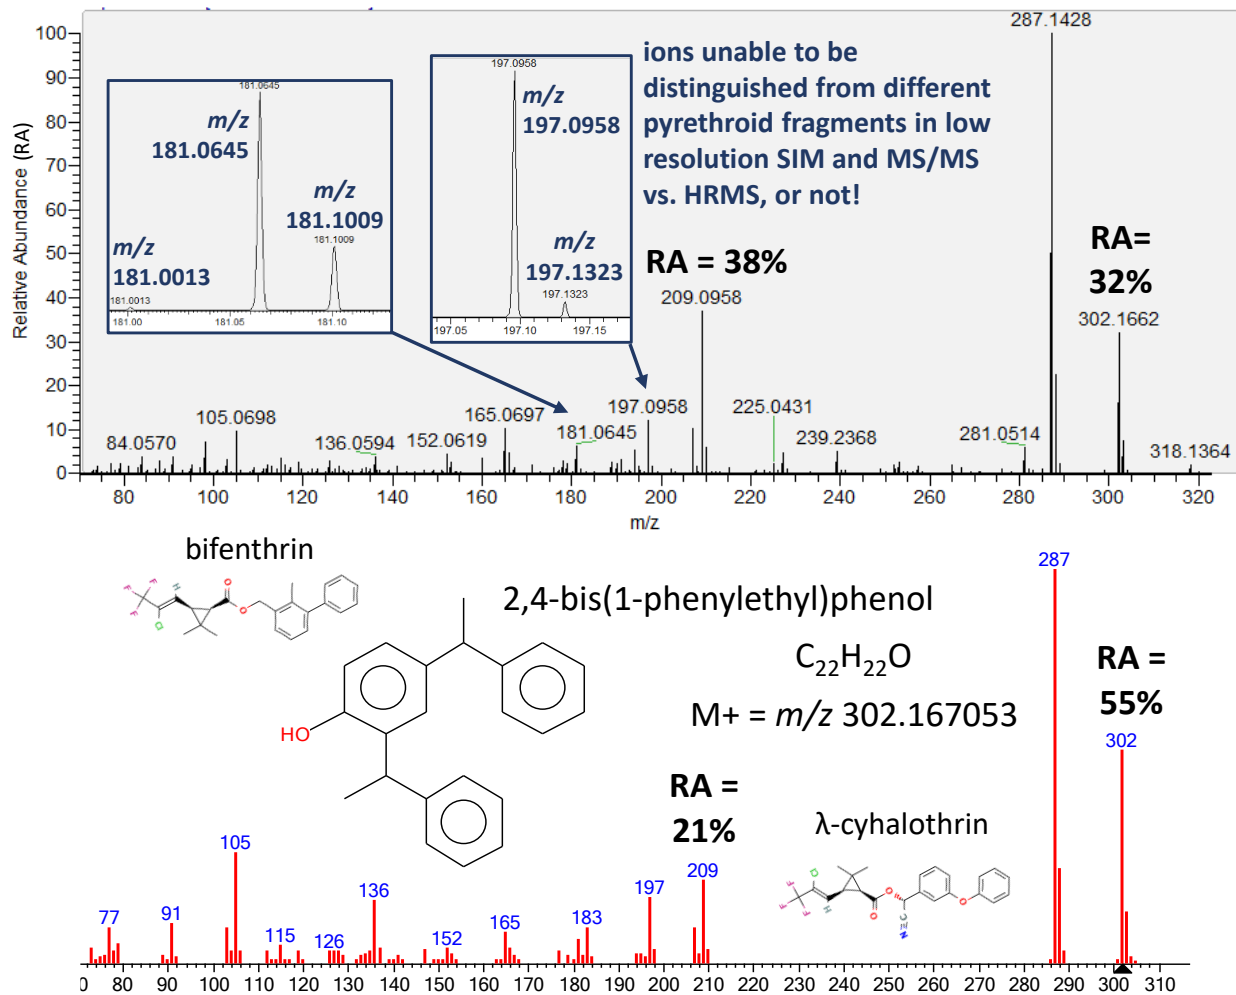

**Figure S3.** Background subtracted HRMS spectrum of the LPGC peak at 6.12 min in Figs. 4 and 5, and the top (88% probability) NIST library search hit, 2,4-bis(1-phenylethyl)phenol, with its chemical structure compared to bifenthrin and  $\lambda$ -cyhalothrin. The  $m/z$  302.1662 HRMS ion has merely -2.8 ppm difference from the calculated monoisotopic mass of  $m/z$  302.1671 for  $C_{22}H_{22}O$ . As in Figure S2 for Cold EI, the relative abundances of the ions in orbitrap were shifted to lower masses compared to the NIST spectrum.

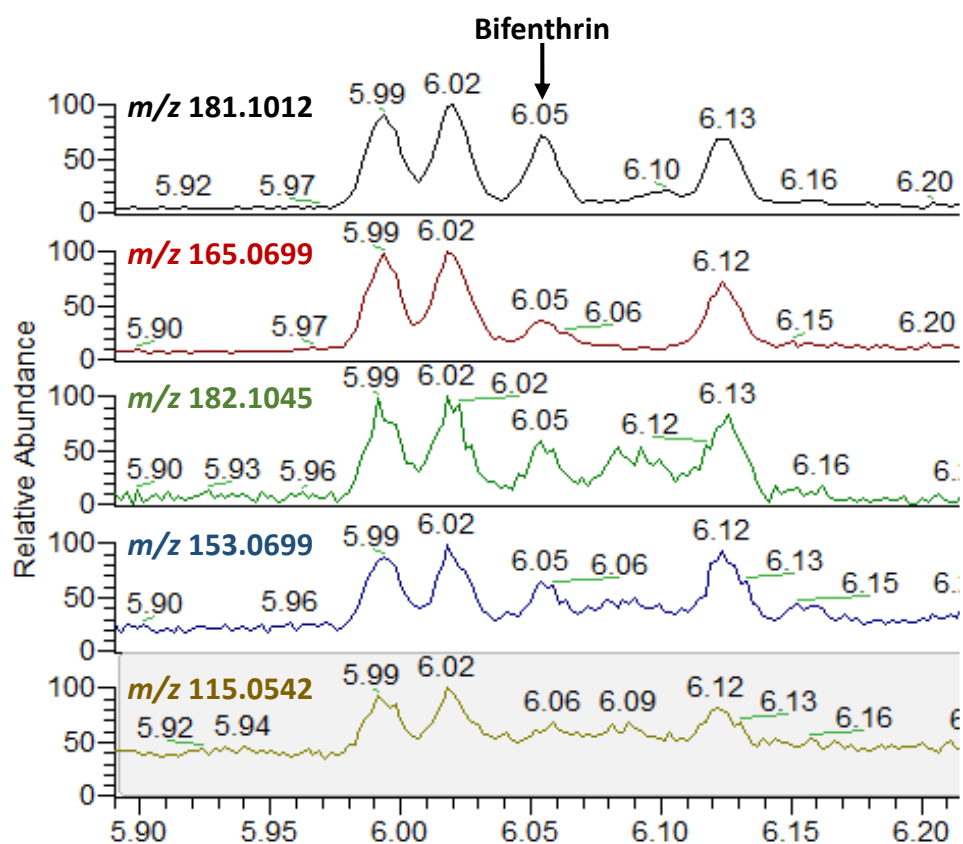

**Figure S4.** Because bifenthrin has the same exact mass fragments as bis(1-phenylethyl)phenol, no distinguishing fragment ion could be found, despite the increased selectivity of HRMS. However, Cold EI was able to sensitively detect the  $M^+$  and  $M+2$  ions, and MS/MS relied on structural differences in the isotopes to better isolate bifenthrin from the chemical noise.

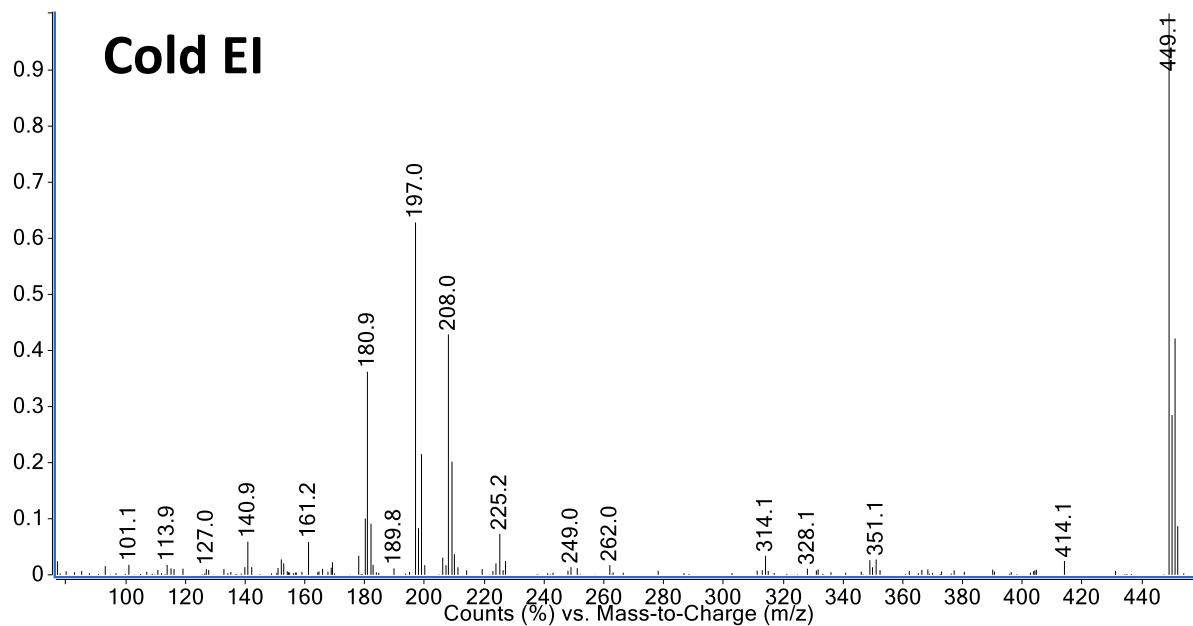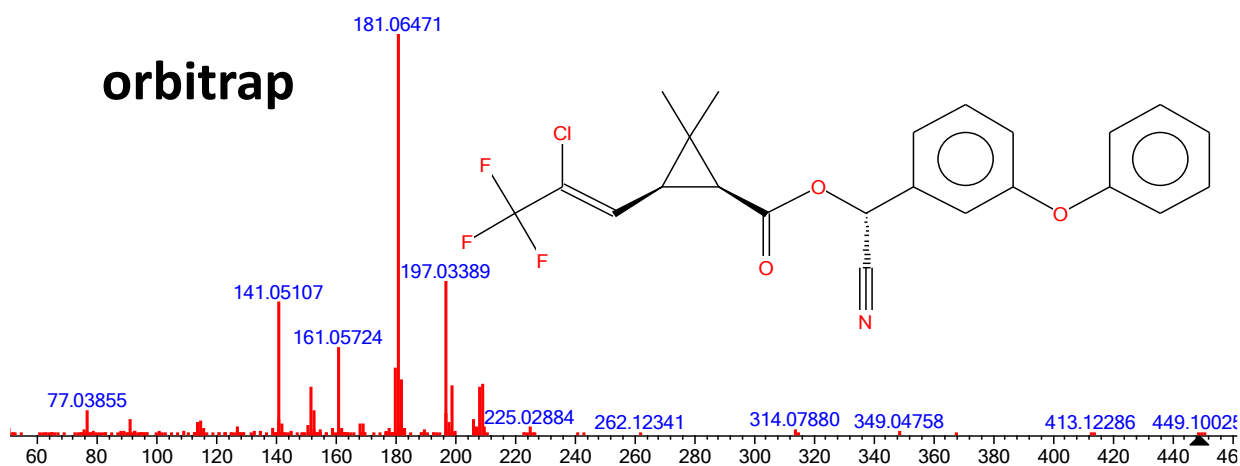

**Figure S5.** Comparison of the measured full-scan Cold EI and library HRMS (orbitrap) spectra of  $\lambda$ -cyhalothrin (co-elution with lactofen in the study did not yield a clean spectrum for display). The dramatic enhancement of the  $m/z$  449  $M^+$  ion in Cold EI led to it becoming the base peak from essentially 0% relative abundance in standard EI.

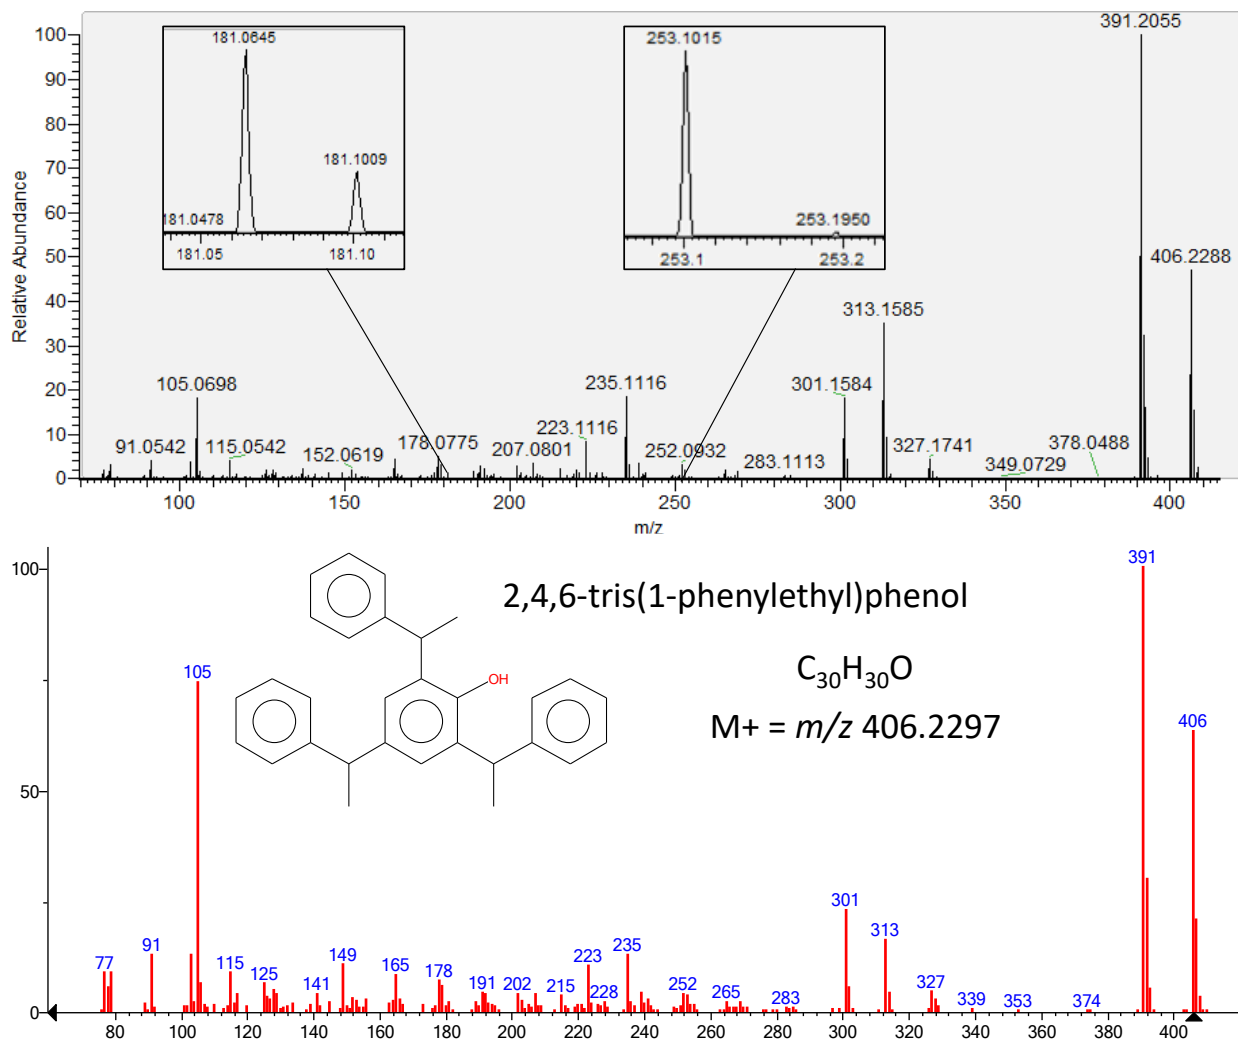

**Figure S6.** Background subtracted HRMS spectrum of the LPGC-MS/MS peak at 7.12 min in Figure 7 and the top NIST library search hit, 2,4,6-tris(1-phenylethyl)phenol, with 98% probability. The  $m/z$  406.2288 HRMS ion has merely -2.2 ppm difference from the calculated monoisotopic mass for  $C_{30}H_{30}O$ . Despite the very high concentration of the interferants, the large mass defect of  $m/z$  253 deltamethrin fragment ions containing Br avoided interferences, unlike non-halogenated ions from bifenthrin,  $\lambda$ -cyhalothrin, and fenpropathrin.

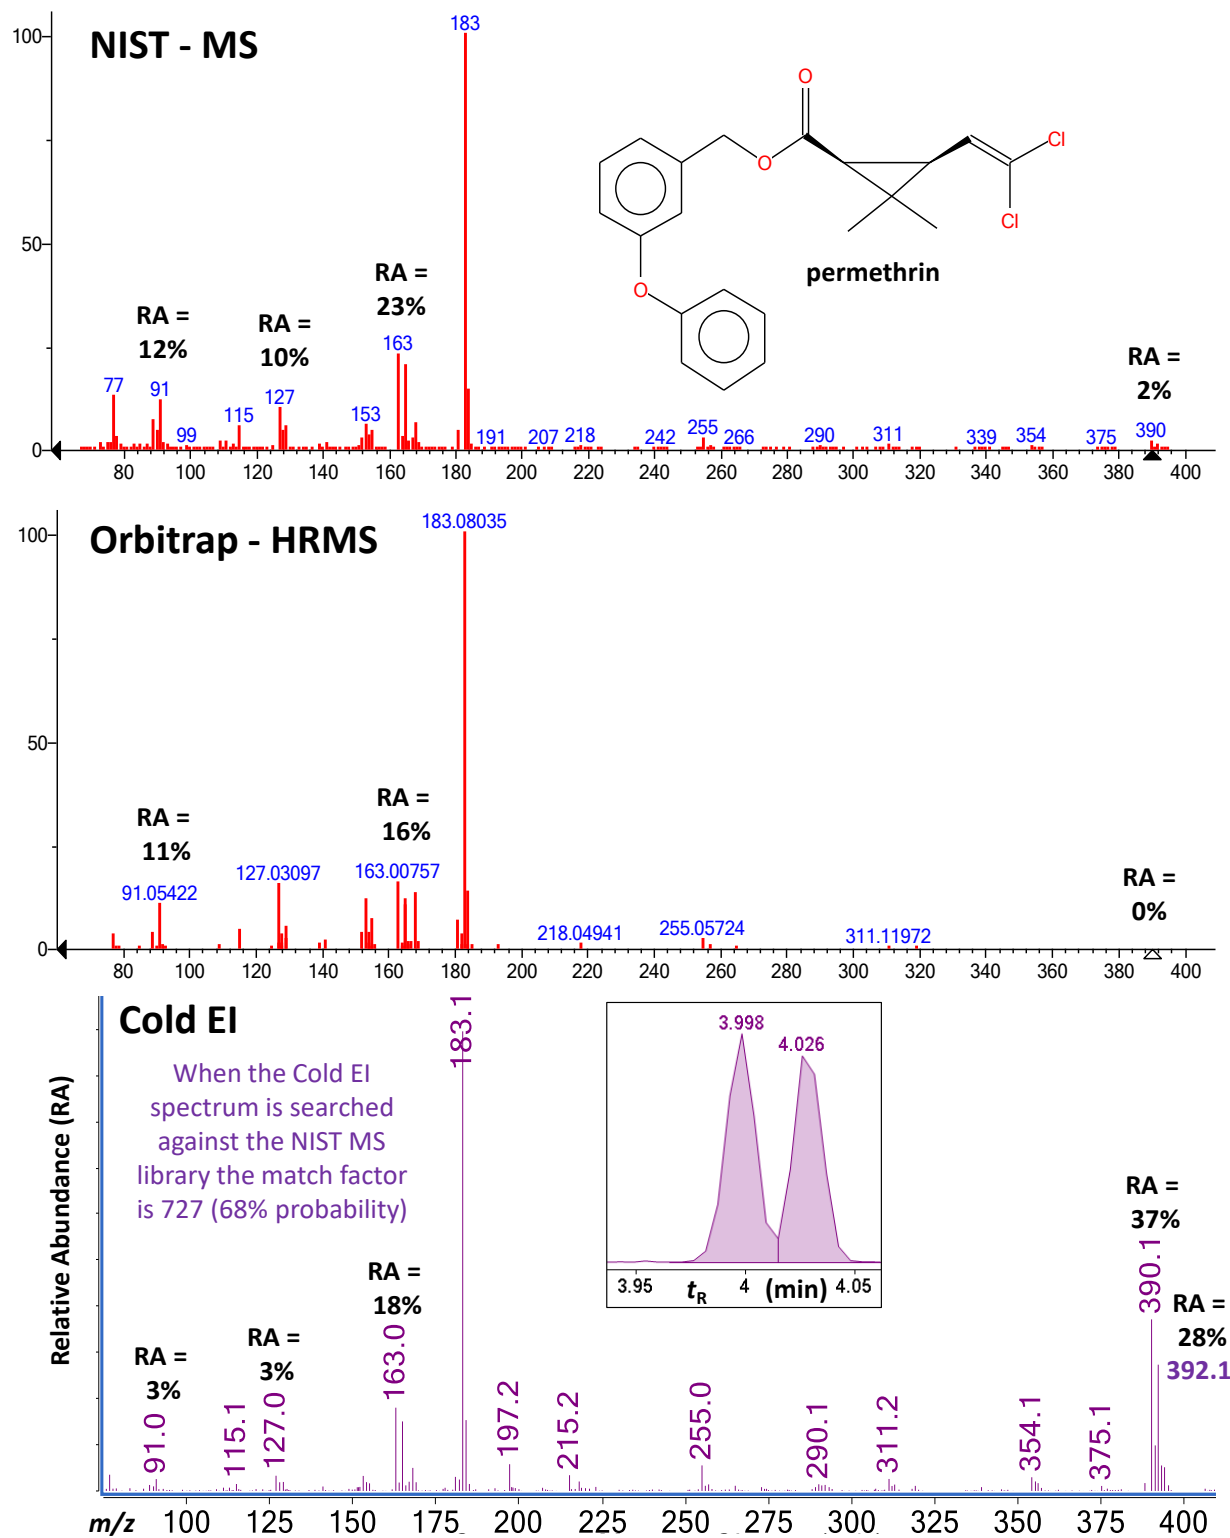

**Figure S7.** NIST and orbitrap library spectra of permethrin compared with the spectrum from Cold EI, demonstrating the significant enhancement of the  $M^+$  and reduction in the relative abundances of the low mass ions at  $m/z$  91 and 127. Also, the fast-GC insert of *cis/trans*-permethrin in the 1/1 reference standard shows equal peak heights in Cold EI.

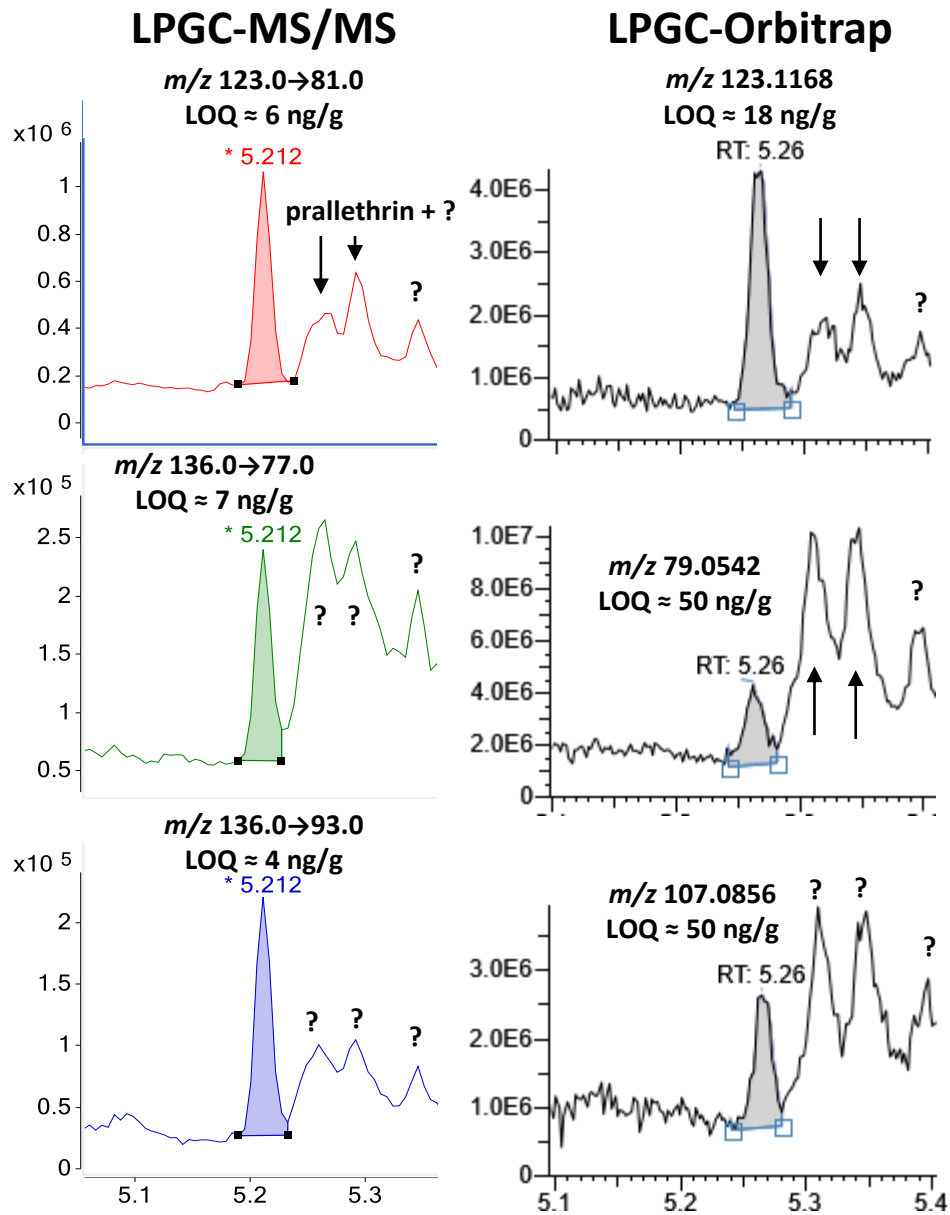

**Figure S8.** Comparison in the analysis of 100 ng/g (75 pg injected) allethrin in barley extract using the different LPGC- MS analyzers. Allethrin is fully separated from prallethrin and an unknown background component by the LPGC method with the usual 3-10 times lower LOQs in targeted MS/MS vs. non-targeted orbitrap HRMS detection. Fig. 13 shows that the m/z 136 and 107 ions are distinctive to allethrin, not prallethrin, which is why the chemical noise peak profiles change depending on the ions.



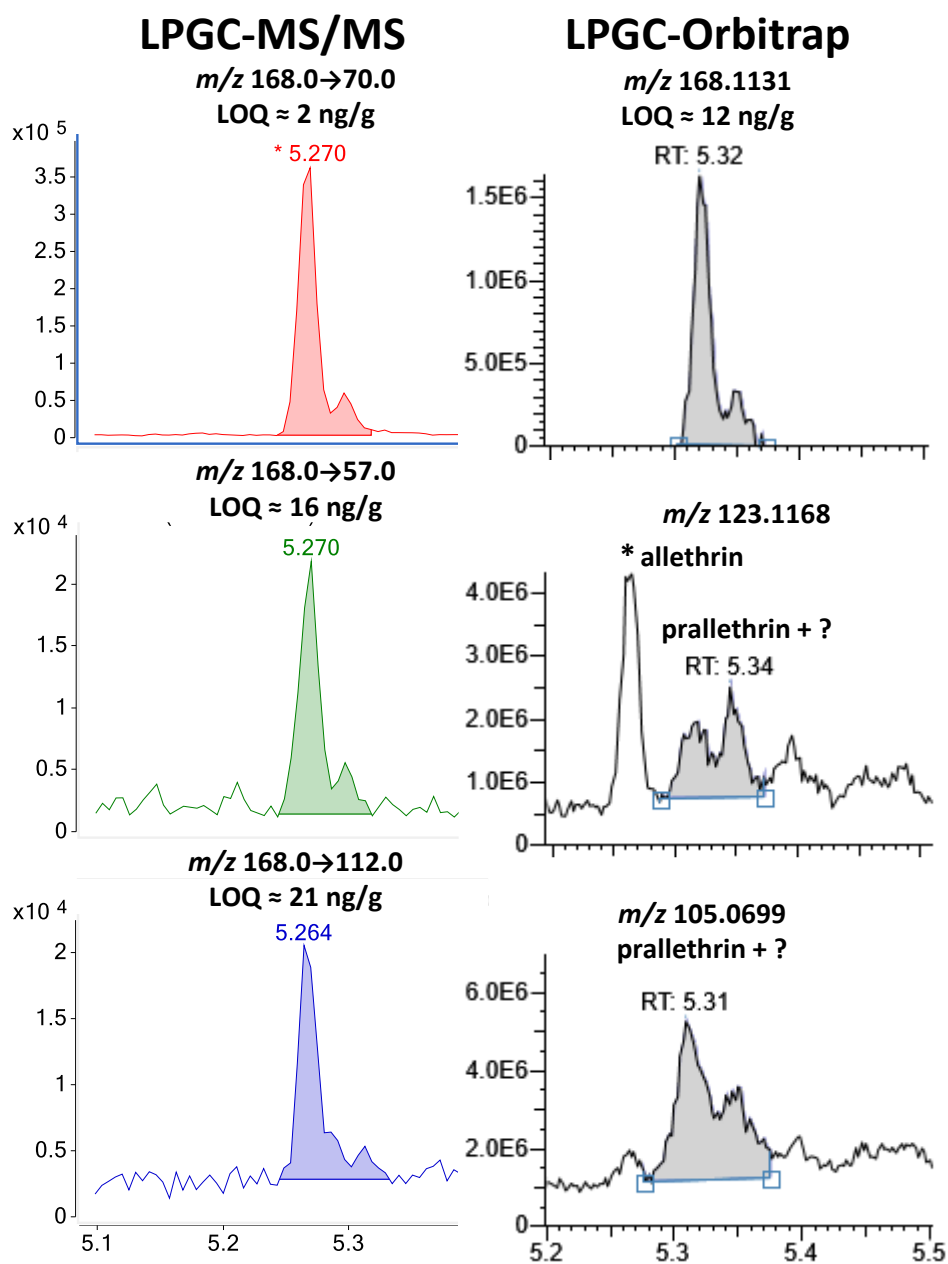

**Figure S9.** Comparison in the analysis of 100 ng/g (75 pg injected) triadimenol, easily confused with prallethrin, in barley extract using the different LPGC- MS analyzers. As shown in Fig. 13, the  $m/z$  168 ion is shared by both prallethrin and allethrin, but it is even more prominent in co-eluting triadimenol. The Thermo/NIST HRMS library spectrum for  $m/z$  168.1131 shown in Fig. 13 looks to be incorrect. Unfortunately, prallethrin was still adversely impacted by the background interferant(s) at  $m/z$  123.1168 and 105.0699, which is why the peak profiles are different.

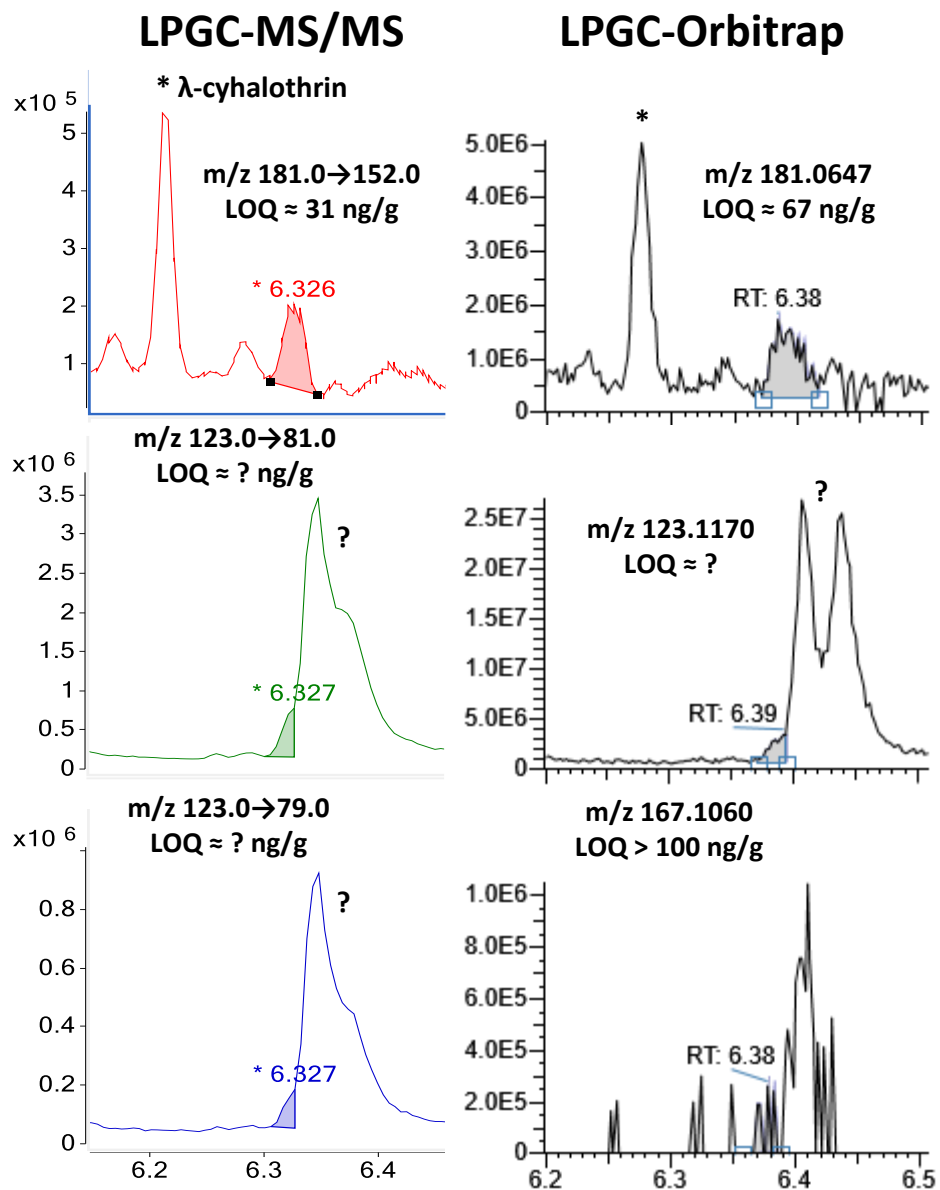

**Figure S10.** Comparison in the analysis of 100 ng/g (75 pg injected) cyphenothrin in barley extract using the different LPGC- MS analyzers. Unknown barley (first peak) and reagent matrix components interfered with the  $m/z$  123 ion in both MS/MS and HRMS.

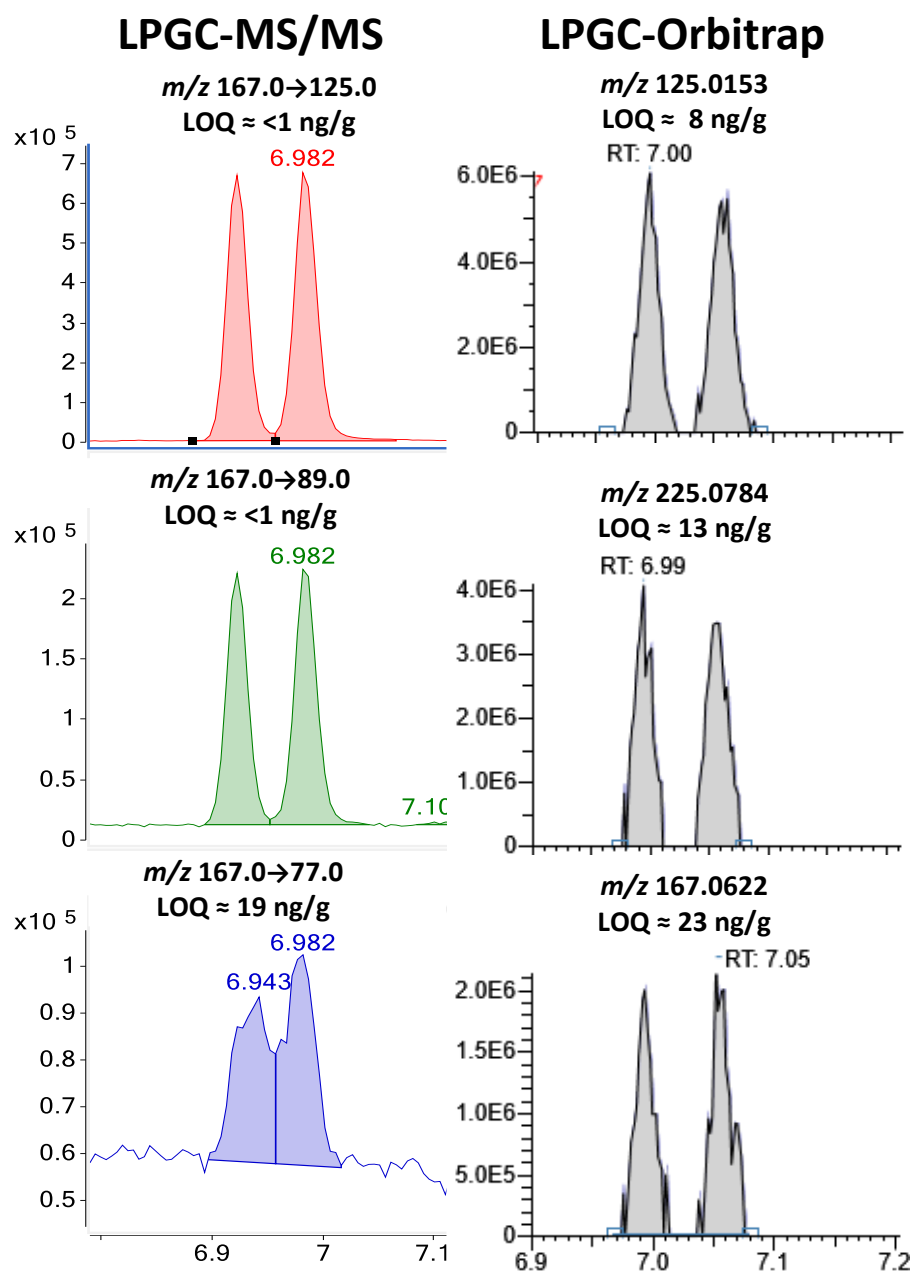

**Figure S11.** Comparison in the analysis of 100 ng/g (75 pg injected) es/fenvalerate in barley extract using the different LPGC- MS analyzers. The LOQs for the individual esfenvalerate and fenvalerate standards were about half of the reported LOQs for the summed pair.

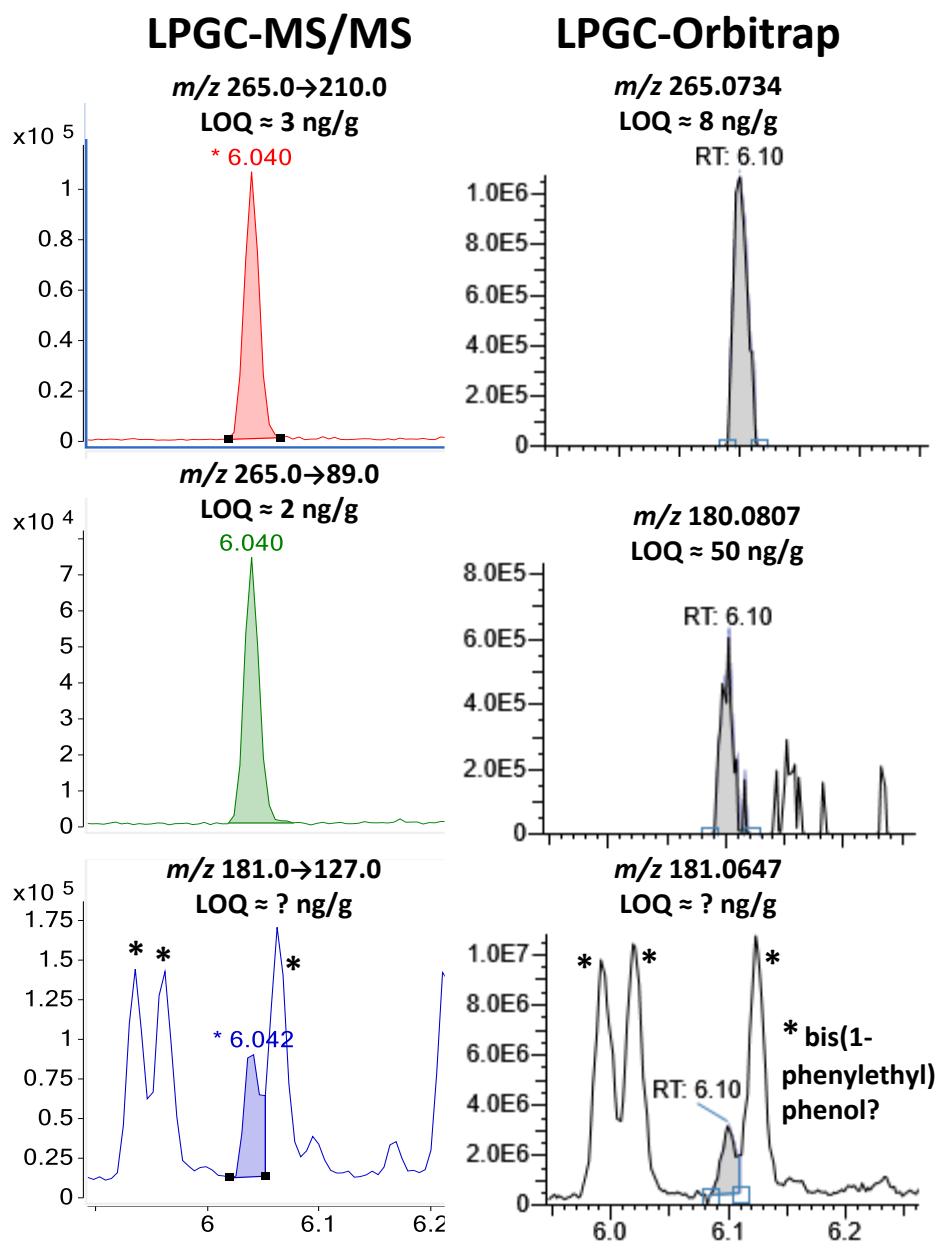

**Figure S12.** Comparison in the analysis of 100 ng/g (75 pg injected) fenpropathrin in barley extract using the different LPGC- MS analyzers. The bis(1-phenylethyl)phenol peaks interfered with the  $m/z$  181 fragment / precursor ion as in the case of bifenthrin and  $\lambda$ -cyhalothrin in Figs. 4 and 5. Unfortunately, fenpropathrin partially co-eluted with one of the interferants, and since it originated from the exact same fragment, selective MS/MS conditions as used for bifenthrin were not possible.

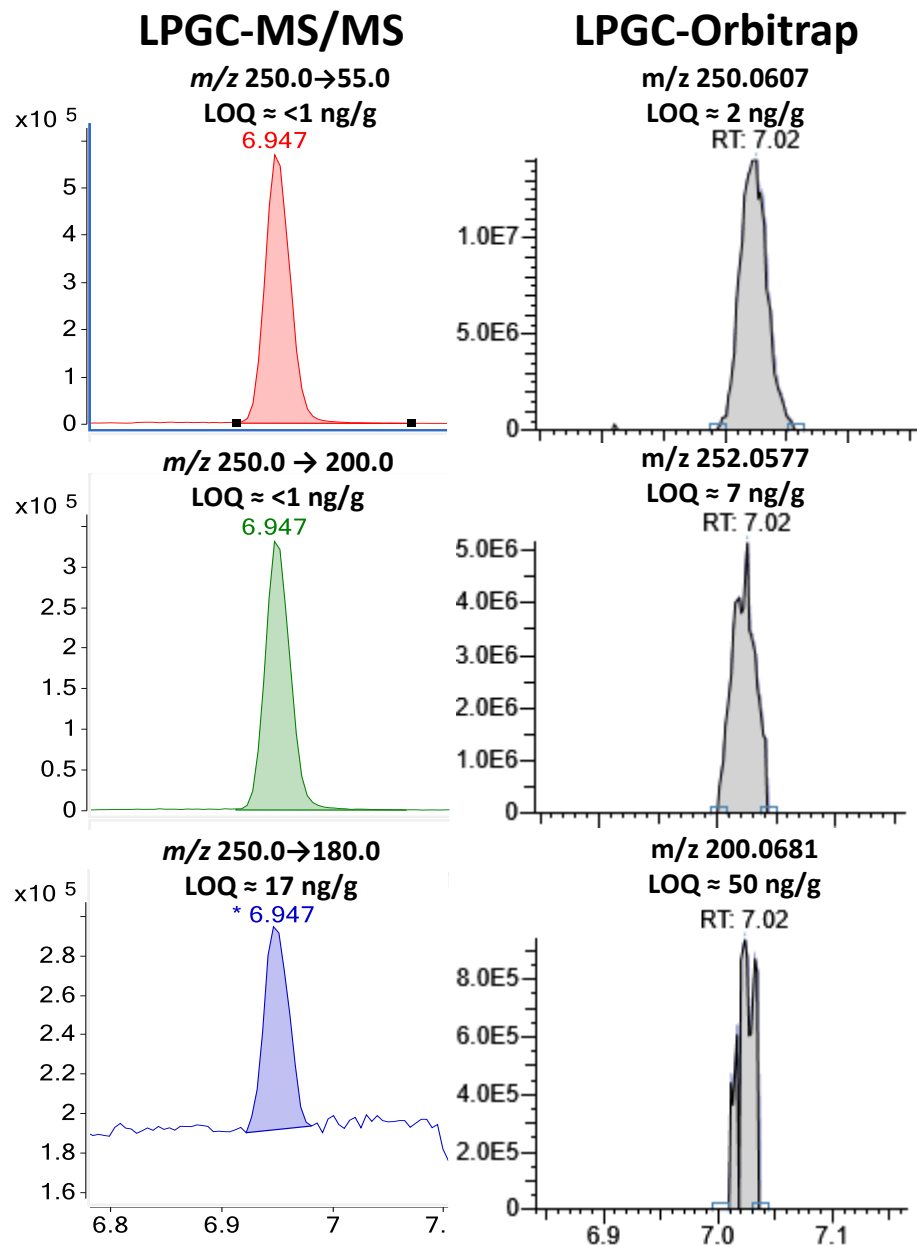

**Figure S13.** Comparison in the analysis of 100 ng/g (75 pg injected) fluvalinate in barley extract using the different LPGC- MS analyzers.

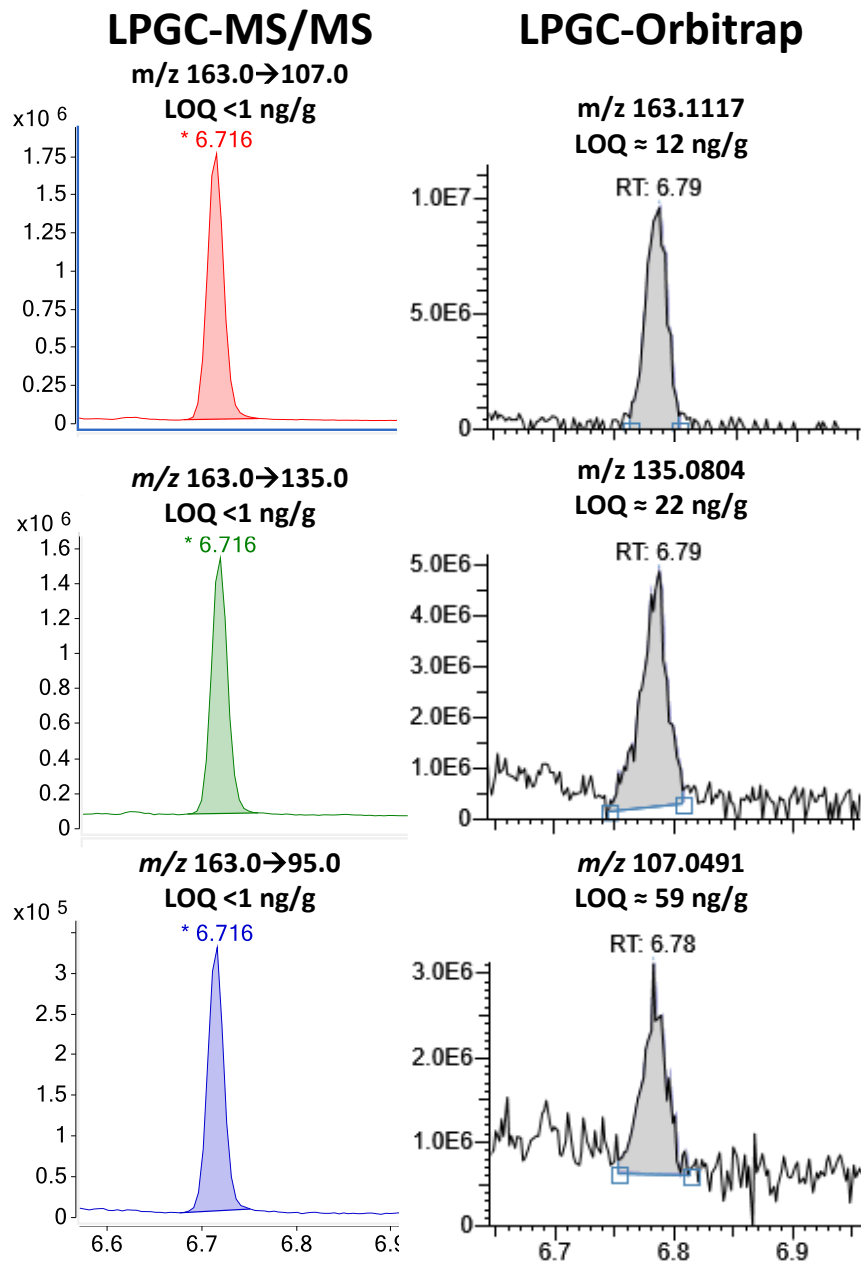

**Figure S14.** Comparison in the analysis of 100 ng/g (75 pg injected) etofenprox in barley extract using the different LPGC- MS analyzers.

**Table S1.** Listing of relative abundances (%) of all exact mass EI-HRMS ions (>5 ppm apart) with ≥1% relative abundance for which at least one pyrethroid in Thermo’s orbitrap or NIST libraries. The pyrethroid analytes included in this study consist of: ale = allethrin; bif = bifenthrin; cyf = cyfluthrin; cyh = λ-cyhalothrin; cpe = cypermethrin; cph = cyphenothrin; del = deltamethrin; esf = es/fenvalerate; eto = etofenprox; fen = fenpropathrin; flu = fluvalinate; per = *cis/trans*-permethrins; phe = phenothrin; pra = prallethrin; res = resmethrin; tet = tetramethrin. Column headings: Mol. Form. = molecular formula; sum = sum of relative abundances (%) for the listed ion (red highlight for sum>10%); #pyr = no. of pyrethroids with relative ion abundance ≥1% for the listed ion (red highlight for #pyr>1). Base peaks for each analyte appear in bold text. Notes: empty cells = not done; isotopologues appear in bold purple text; “-” = not listed; “0” means <0.5% relative abundance; and ions rounded to the same *m/z* integer are boxed and highlighted in gold.

| Mol. Form. | ion ( <i>m/z</i> ) | ale | bif | cyf | cyh | cpe | cph | del | esf | eto | fen | flu | per | phe | pra | res | tet | sum | #pyr |
|------------|--------------------|-----|-----|-----|-----|-----|-----|-----|-----|-----|-----|-----|-----|-----|-----|-----|-----|-----|------|
|            | 421.1249           | -   | -   | -   | -   | -   | -   | -   | 1   | -   | -   | -   | -   | -   | -   | -   | -   | 1   | 1    |
|            | 420.1319           | -   | -   | -   | -   | -   | -   | -   | 1   | -   | -   | -   | -   | -   | -   | -   | -   | 1   | 1    |
|            | 419.1285           | -   | -   | -   | -   | -   | -   | -   | 5   | -   | -   | -   | -   | -   | -   | -   | -   | 5   | 1    |
|            | 417.2538           | -   | -   | -   | -   | -   | -   | -   | 3   | -   | -   | -   | -   | -   | -   | -   | -   | 3   | 1    |
|            | 376.2033           | -   | -   | -   | -   | -   | -   | -   | -   | 1   | -   | -   | -   | -   | -   | -   | -   | 1   | 1    |
|            | 349.1673           | -   | -   | -   | -   | -   | -   | -   | -   | -   | 2   | -   | -   | -   | -   | -   | -   | 2   | 1    |
|            | 338.1878           | -   | -   | -   | -   | -   | -   | -   | -   | -   | -   | -   | -   | -   | -   | 2   | -   | 2   | 1    |
|            | 334.1439           | -   | -   | -   | -   | -   | -   | -   | -   | -   | 4   | -   | -   | -   | -   | -   | -   | 4   | 1    |
|            | 327.9848           | -   | -   | -   | -   | -   | -   | -   | 2   | -   | -   | -   | -   | -   | -   | -   | -   | 2   | 1    |
|            | 323.1642           | -   | -   | -   | -   | -   | -   | -   | -   | -   | -   | -   | -   | -   | -   | 2   | -   | 2   | 1    |
|            | 314.0788           | -   | -   | -   | 1   | -   | -   | -   | -   | -   | -   | -   | -   | -   | -   | -   | -   | 1   | 1    |
|            | 304.1699           | -   | -   | -   | -   | -   | -   | -   | -   | -   | 2   | -   | -   | -   | -   | -   | -   | 2   | 1    |
|            | 303.1618           | -   | -   | -   | -   | -   | -   | -   | -   | -   | 1   | -   | -   | -   | -   | -   | -   | 1   | 1    |
|            | 298.8923           | -   | -   | -   | -   | -   | -   | 1   | -   | -   | -   | -   | -   | -   | -   | -   | -   | 1   | 1    |
|            | 296.8945           | -   | -   | -   | -   | -   | -   | 3   | -   | -   | -   | -   | -   | -   | -   | -   | -   | 3   | 1    |
|            | 294.8962           | -   | -   | -   | -   | -   | -   | 1   | -   | -   | -   | -   | -   | -   | -   | -   | -   | 1   | 1    |
|            | 294.1979           | -   | -   | -   | -   | -   | -   | -   | -   | -   | -   | -   | -   | -   | -   | 2   | -   | 2   | 1    |
|            | 293.0730           | -   | -   | -   | -   | -   | -   | -   | 1   | -   | -   | -   | -   | -   | -   | -   | -   | 1   | 1    |
|            | 290.1541           | -   | -   | -   | -   | -   | -   | -   | -   | -   | 1   | -   | -   | -   | -   | -   | -   | 1   | 1    |
|            | 280.9000           | -   | -   | -   | -   | -   | -   | 1   | -   | -   | -   | -   | -   | -   | -   | -   | -   | 1   | 1    |
|            | 279.1744           | -   | -   | -   | -   | -   | -   | -   | -   | -   | -   | -   | -   | -   | -   | 3   | -   | 3   | 1    |
|            | 266.0767           | -   | -   | -   | -   | -   | -   | -   | -   | -   | 5   | -   | -   | -   | -   | -   | -   | 5   | 1    |

| Mol. Form.                                                                     | ion (m/z) | ale | bif | cyf | cyh | cpe | cph | del | esf | eto | fen | flu | per | phe | pra | res | tet | sum | #pyr |
|--------------------------------------------------------------------------------|-----------|-----|-----|-----|-----|-----|-----|-----|-----|-----|-----|-----|-----|-----|-----|-----|-----|-----|------|
| C <sub>16</sub> H <sub>11</sub> NO <sub>3</sub>                                | 265.0734  | -   | -   | -   | -   | -   | -   | -   | -   | -   | 29  | -   | -   | -   | -   | -   | -   | 29  | 1    |
|                                                                                | 255.9060  | -   | -   | -   | -   | -   | -   | 2   | -   | -   | -   | -   | -   | -   | -   | -   | -   | 2   | 1    |
| C <sub>16</sub> H <sub>12</sub> ClO                                            | 255.0572  | -   | -   | -   | -   | -   | -   | -   | -   | -   | -   | -   | 2   | -   | -   | -   | -   | 2   | 1    |
| C <sub>7</sub> H <sub>9</sub> <sup>81</sup> Br <sub>2</sub>                    | 254.9026  | -   | -   | -   | -   | -   | -   | 26  | -   | -   | -   | -   | -   | -   | -   | -   | -   | 26  | 1    |
| C <sub>6</sub> <sup>13</sup> CH <sub>9</sub> <sup>79</sup> Br <sup>81</sup> Br | 253.9081  | -   | -   | -   | -   | -   | -   | 4   | -   | -   | -   | -   | -   | -   | -   | -   | -   | 4   | 1    |
| C <sub>7</sub> H <sub>9</sub> <sup>79</sup> Br <sup>81</sup> Br                | 252.9046  | -   | -   | -   | -   | -   | -   | 53  | -   | -   | -   | -   | -   | -   | -   | -   | -   | 53  | 1    |
| C <sub>19</sub> H <sub>8</sub> O                                               | 252.0576  | -   | -   | -   | -   | -   | -   | -   | -   | -   | -   | 31  | -   | -   | -   | -   | -   | 31  | 1    |
| C <sub>6</sub> <sup>13</sup> CH <sub>9</sub> Br <sub>2</sub>                   | 251.9102  | -   | -   | -   | -   | -   | -   | 2   | -   | -   | -   | -   | -   | -   | -   | -   | -   | 2   | 1    |
| C <sub>18</sub> H <sub>5</sub> NO                                              | 251.0369  | -   | -   | -   | -   | -   | -   | -   | -   | -   | -   | 11  | -   | -   | -   | -   | -   | 11  | 1    |
| C <sub>7</sub> H <sub>9</sub> Br <sub>2</sub>                                  | 250.9067  | -   | -   | -   | -   | -   | -   | 27  | -   | -   | -   | -   | -   | -   | -   | -   | -   | 27  | 1    |
| C <sub>16</sub> H <sub>10</sub> O <sub>3</sub>                                 | 250.0607  | -   | -   | -   | -   | -   | -   | -   | -   | -   | -   | 100 | -   | -   | -   | -   | -   | 100 | 1    |
|                                                                                | 247.1330  | -   | -   | -   | -   | -   | -   | -   | -   | -   | -   | -   | -   | -   | -   | 2   | -   | 2   | 1    |
|                                                                                | 247.0993  | -   | -   | -   | -   | -   | -   | -   | -   | -   | 1   | -   | -   | -   | -   | -   | -   | 1   | 1    |
|                                                                                | 239.1425  | -   | -   | -   | -   | -   | -   | -   | -   | -   | -   | -   | -   | -   | -   | 4   | -   | 4   | 1    |
|                                                                                | 238.8525  | -   | -   | -   | -   | -   | -   | 2   | -   | -   | -   | -   | -   | -   | -   | -   | -   | 2   | 1    |
|                                                                                | 238.1354  | -   | -   | -   | -   | -   | -   | -   | -   | -   | -   | -   | -   | -   | -   | 2   | -   | 2   | 1    |
|                                                                                | 228.0780  | -   | -   | -   | -   | -   | -   | -   | -   | -   | -   | -   | -   | -   | -   | 1   | -   | 1   | 1    |
| C <sub>14</sub> H <sub>10</sub> FNO                                            | 227.0745  | -   | -   | 13  | -   | -   | -   | -   | -   | -   | -   | -   | -   | -   | -   | -   | -   | 13  | 1    |
| C <sub>13</sub> <sup>13</sup> CH <sub>11</sub> NO <sub>2</sub>                 | 226.0818  | -   | -   | -   | -   | -   | -   | -   | 7   | -   | -   | -   | -   | -   | -   | -   | -   | 7   | 1    |
| C <sub>14</sub> H <sub>9</sub> FNO                                             | 226.0663  | -   | -   | 27  | -   | -   | -   | -   | -   | -   | -   | -   | -   | -   | -   | -   | -   | 27  | 1    |
| C <sub>14</sub> H <sub>11</sub> NO <sub>2</sub>                                | 225.0785  | -   | -   | -   | -   | 1   | -   | -   | 48  | -   | 1   | -   | -   | -   | -   | -   | -   | 50  | 1    |
| C <sub>12</sub> H <sub>8</sub> ClF <sub>2</sub>                                | 225.0288  | -   | 0   | -   | 2   | -   | -   | -   | -   | -   | -   | -   | -   | -   | -   | -   | -   | 2   | 1    |
|                                                                                | 223.1109  | -   | -   | -   | -   | -   | -   | -   | -   | -   | -   | -   | -   | -   | -   | 1   | -   | 1   | 1    |
|                                                                                | 223.0629  | -   | -   | -   | 0   | 1   | -   | -   | 1   | -   | -   | -   | -   | -   | -   | -   | -   | 2   | 1    |
|                                                                                | 219.0680  | -   | -   | -   | -   | -   | -   | -   | 0   | -   | 2   | -   | -   | -   | -   | -   | -   | 2   | 1    |
|                                                                                | 218.0494  | -   | -   | -   | -   | -   | -   | -   | -   | -   | -   | -   | 1   | -   | -   | -   | -   | 1   | 1    |
|                                                                                | 211.0709  | -   | -   | -   | 0   | -   | -   | -   | -   | -   | 1   | -   | -   | -   | -   | -   | -   | 1   | 1    |
|                                                                                | 210.8574  | -   | -   | -   | -   | -   | -   | 2   | -   | -   | -   | -   | -   | -   | -   | -   | -   | 2   | 1    |
|                                                                                | 210.0869  | -   | -   | -   | 2   | 3   | -   | 3   | 2   | -   | 2   | -   | -   | -   | -   | -   | -   | 12  | 5    |
|                                                                                | 210.0678  | -   | -   | -   | 1   | -   | -   | -   | 0   | -   | 8   | -   | -   | -   | -   | -   | -   | 10  | 1    |



| Mol. Form.                                                     | ion (m/z) | ale | bif | cyf        | cyh | cpe | cph | del | esf | eto | fen | flu | per        | phe        | pra | res | tet | sum | #pyr |
|----------------------------------------------------------------|-----------|-----|-----|------------|-----|-----|-----|-----|-----|-----|-----|-----|------------|------------|-----|-----|-----|-----|------|
| C <sub>14</sub> H <sub>11</sub> NO                             | 209.0836  | -   | -   | -          | 13  | 21  | -   | 19  | 10  | -   | 17  | -   | -          | -          | -   | -   | -   | 79  | 5    |
| C <sub>14</sub> H <sub>10</sub> NO                             | 208.0760  | -   | -   | -          | 12  | 6   | -   | 6   | 3   | -   | 9   | -   | -          | -          | -   | -   | -   | 36  | 5    |
| C <sub>11</sub> H <sub>3</sub> F <sub>3</sub> O                | 208.0135  | -   | -   | -          | -   | -   | -   | -   | -   | -   | -   | 2   | -          | -          | -   | -   | -   | 2   | 1    |
| C <sub>14</sub> H <sub>9</sub> NO                              | 207.0683  | -   | -   | -          | 2   | 3   | -   | 3   | 1   | -   | 2   | -   | -          | -          | -   | -   | -   | 12  | 5    |
| <b>C<sub>13</sub><sup>13</sup>CH<sub>8</sub>NO</b>             | 207.0634  | -   | -   | 15         | 1   | -   | -   | -   | 1   | -   | 1   | -   | -          | -          | -   | -   | -   | 17  | 1    |
| C <sub>8</sub> H <sub>9</sub> Cl <sub>2</sub> O <sub>2</sub>   | 206.9976  | -   | -   | -          | -   | 2   | -   | -   | -   | -   | -   | -   | -          | -          | -   | -   | -   | 2   | 1    |
| C <sub>14</sub> H <sub>8</sub> NO                              | 206.0601  | -   | -   | <b>100</b> | 4   | 7   | -   | 6   | 4   | -   | 6   | -   | -          | -          | -   | -   | -   | 128 | 6    |
| C <sub>11</sub> HF <sub>3</sub> O                              | 205.9978  | -   | -   | -          | -   | -   | -   | -   | -   | -   | -   | 5   | -          | -          | -   | -   | -   | 5   | 1    |
|                                                                | 203.1431  | -   | -   | -          | -   | -   | -   | -   | -   | -   | -   | -   | -          | -          | -   | 2   | -   | 2   | 1    |
| C <sub>14</sub> H <sub>17</sub> O                              | 201.1274  | -   | -   | -          | -   | -   | -   | -   | -   | -   | -   | -   | -          | -          | -   | 1   | -   | 1   | 1    |
| <b>C<sub>3</sub>H<sub>3</sub><sup>81</sup>Br<sub>2</sub></b>   | 200.8555  | -   | -   | -          | -   | -   | -   | 2   | -   | -   | -   | -   | -          | -          | -   | -   | -   | 2   | 1    |
| C <sub>10</sub> H <sub>9</sub> F <sub>3</sub> N                | 200.0681  | -   | -   | -          | -   | -   | -   | -   | -   | -   | -   | 6   | -          | -          | -   | -   | -   | 6   | 1    |
| C <sub>10</sub> H <sub>13</sub> ClO <sub>2</sub>               | 200.0588  | -   | -   | 10         | -   | -   | -   | -   | -   | -   | -   | -   | -          | -          | -   | -   | -   | 10  | 1    |
| C <sub>11</sub> H <sub>6</sub> NO <sub>3</sub>                 | 200.0342  | -   | -   | -          | 1   | -   | -   | -   | -   | -   | -   | -   | -          | -          | -   | -   | -   | 1   | 1    |
| C <sub>13</sub> H <sub>8</sub> FO                              | 199.0554  | -   | -   | 69         | 0   | -   | -   | -   | -   | -   | -   | -   | -          | -          | -   | -   | -   | 70  | 1    |
| <b>C<sub>8</sub>H<sub>9</sub><sup>37</sup>ClF<sub>3</sub></b>  | 199.0310  | -   | 0   | -          | 12  | -   | -   | -   | -   | -   | -   | -   | -          | -          | -   | -   | -   | 12  | 1    |
| <b>C<sub>3</sub>H<sub>3</sub>Br<sup>81</sup>Br</b>             | 198.8575  | -   | -   | -          | -   | -   | -   | 4   | 0   | -   | -   | -   | -          | -          | -   | -   | -   | 5   | 1    |
| <b>C<sub>12</sub><sup>13</sup>CH<sub>9</sub>O<sub>2</sub></b>  | 198.0676  | -   | -   | -          | 1   | 3   | -   | 2   | 3   | 0   | 2   | -   | -          | -          | -   | -   | -   | 12  | 5    |
| <b>C<sub>7</sub><sup>13</sup>CH<sub>9</sub>ClF<sub>3</sub></b> | 198.0372  | -   | -   | -          | 3   | -   | -   | -   | -   | -   | -   | -   | -          | -          | -   | -   | -   | 3   | 1    |
| C <sub>13</sub> H <sub>9</sub> O <sub>2</sub>                  | 197.0597  | -   | -   | -          | 5   | 6   | -   | 5   | 7   | 0   | 3   | -   | -          | -          | -   | -   | -   | 26  | 5    |
| C <sub>8</sub> H <sub>9</sub> ClF <sub>3</sub>                 | 197.0339  | -   | 0   | -          | 38  | -   | -   | -   | -   | -   | -   | -   | -          | -          | -   | -   | -   | 38  | 1    |
| C <sub>12</sub> H <sub>5</sub> O <sub>3</sub>                  | 197.0232  | -   | -   | -          | 0   | -   | -   | 2   | -   | -   | -   | -   | -          | -          | -   | -   | -   | 3   | 1    |
| C <sub>3</sub> H <sub>3</sub> Br <sub>2</sub>                  | 196.8597  | -   | -   | -          | -   | -   | -   | 2   | -   | -   | -   | -   | -          | -          | -   | -   | -   | 2   | 1    |
|                                                                | 190.0652  | -   | -   | -          | 1   | 2   | -   | 2   | 1   | -   | 2   | -   | -          | -          | -   | -   | -   | 8   | 5    |
| <b>C<sub>11</sub><sup>13</sup>CH<sub>11</sub>O</b>             | 184.0838  | -   | -   | -          | -   | -   | -   | -   | -   | 1   | -   | -   | 14         | 16         | -   | -   | -   | 30  | 2    |
| <b>C<sub>12</sub><sup>13</sup>C<sub>2</sub>H<sub>13</sub></b>  | 183.1080  | -   | 1   | -          | -   | -   | -   | -   | -   | -   | -   | -   | -          | -          | -   | -   | -   | 1   | 1    |
| C <sub>13</sub> H <sub>11</sub> O                              | 183.0804  | -   | -   | -          | 1   | -   | -   | -   | 0   | 5   | 1   | -   | <b>100</b> | <b>100</b> | -   | -   | -   | 207 | 3    |
| C <sub>6</sub> H <sub>3</sub> ClF <sub>3</sub> O               | 182.9818  | -   | -   | -          | 2   | -   | -   | -   | -   | -   | -   | -   | -          | -          | -   | -   | -   | 2   | 1    |
| <b>C<sub>13</sub><sup>13</sup>CH<sub>13</sub></b>              | 182.1045  | -   | 15  | -          | -   | -   | -   | -   | -   | -   | -   | -   | -          | -          | -   | -   | -   | 15  | 1    |
| C <sub>13</sub> H <sub>10</sub> O                              | 182.0727  | -   | -   | -          | -   | -   | -   | -   | -   | 1   | -   | -   | 3          | -          | -   | -   | -   | 4   | 1    |

| Mol. Form.                                                    | ion (m/z) | ale | bif | cyf | cyh | cpe | cph | del | esf | eto | fen | flu | per | phe | pra | res | tet | sum | #pyr |
|---------------------------------------------------------------|-----------|-----|-----|-----|-----|-----|-----|-----|-----|-----|-----|-----|-----|-----|-----|-----|-----|-----|------|
| <b>C<sub>12</sub><sup>13</sup>CH<sub>9</sub>O</b>             | 182.0682  | -   | -   | -   | 14  | 14  | -   | 14  | 7   | 0   | 14  | -   | 1   | -   | -   | -   | -   | 63  | 5    |
| C <sub>14</sub> H <sub>13</sub>                               | 181.1011  | -   | 100 | -   | -   | -   | -   | -   | -   | -   | -   | -   | -   | -   | -   | -   | -   | 100 | 1    |
| C <sub>13</sub> H <sub>11</sub> N                             | 181.0889  | -   | -   | -   | 0   | 1   | -   | 1   | -   | -   | 1   | -   | -   | -   | -   | -   | -   | 3   | 2    |
| C <sub>6</sub> H                                              | 181.0841  | -   | -   | -   | 2   | 2   | -   | 2   | -   | -   | 2   | -   | -   | -   | -   | -   | -   | 9   | 4    |
| C <sub>13</sub> H <sub>9</sub> O                              | 181.0648  | -   | -   | -   | 100 | 100 | 20  | 100 | 47  | 2   | 100 | 18  | 7   | -   | -   | -   | -   | 493 | 9    |
| C <sub>14</sub> H <sub>12</sub>                               | 180.0933  | -   | 7   | -   | -   | -   | -   | -   | -   | -   | -   | -   | -   | -   | -   | -   | -   | 7   | 1    |
| C <sub>13</sub> H <sub>10</sub> N                             | 180.0808  | -   | -   | -   | 17  | 16  | -   | 17  | 8   | -   | 17  | -   | -   | -   | -   | -   | -   | 75  | 5    |
|                                                               | 179.0855  | -   | 7   | -   | -   | -   | -   | -   | -   | -   | -   | -   | -   | -   | -   | -   | -   | 7   | 1    |
|                                                               | 179.0605  | -   | 0   | -   | 1   | 1   | -   | -   | 0   | -   | 1   | -   | -   | -   | -   | -   | -   | 3   | 2    |
|                                                               | 178.0778  | -   | 7   | -   | -   | -   | -   | -   | -   | -   | -   | -   | -   | -   | -   | -   | -   | 7   | 1    |
|                                                               | 178.0651  | -   | -   | -   | 2   | 2   | -   | 2   | 1   | -   | 2   | -   | -   | -   | -   | -   | -   | 10  | 5    |
|                                                               | 177.0576  | -   | -   | -   | 1   | 1   | -   | 1   | 1   | -   | 1   | -   | -   | -   | -   | -   | -   | 4   | 2    |
|                                                               | 174.9940  | -   | -   | -   | -   | -   | -   | 5   | -   | -   | -   | -   | -   | -   | -   | -   | -   | 5   | 1    |
|                                                               | 174.9896  | -   | -   | -   | -   | -   | -   | 4   | -   | -   | -   | -   | -   | -   | -   | -   | -   | 4   | 1    |
| <b>C<sub>7</sub>H<sub>9</sub><sup>81</sup>Br</b>              | 173.9862  | -   | -   | -   | -   | -   | -   | 58  | -   | -   | -   | -   | -   | -   | -   | -   | -   | 58  | 1    |
|                                                               | 173.0908  | -   | -   | -   | -   | -   | -   | -   | -   | -   | -   | -   | -   | -   | -   | 1   | -   | 1   | 1    |
|                                                               | 172.9961  | -   | -   | -   | -   | -   | -   | 5   | -   | -   | -   | -   | -   | -   | -   | -   | -   | 5   | 1    |
|                                                               | 172.9917  | -   | -   | -   | -   | -   | -   | 4   | -   | -   | -   | -   | -   | -   | -   | -   | -   | 4   | 1    |
|                                                               | 172.9783  | -   | -   | -   | -   | -   | -   | 6   | -   | -   | -   | -   | -   | -   | -   | -   | -   | 6   | 1    |
| C <sub>12</sub> H <sub>12</sub> O                             | 172.0881  | -   | -   | -   | -   | -   | -   | -   | -   | -   | -   | -   | -   | -   | -   | 11  | -   | 11  | 1    |
| <b>C<sub>11</sub><sup>13</sup>CH<sub>11</sub>O</b>            | 172.0839  | -   | -   | -   | -   | -   | -   | -   | -   | -   | -   | -   | -   | -   | -   | 6   | -   | 6   | 1    |
| C <sub>7</sub> H <sub>9</sub> Br                              | 171.9882  | -   | -   | -   | -   | -   | -   | 58  | -   | -   | -   | -   | -   | -   | -   | -   | -   | 58  | 1    |
| C <sub>12</sub> H <sub>11</sub> O                             | 171.0806  | -   | -   | -   | -   | -   | -   | -   | 0   | -   | -   | -   | -   | -   | -   | 47  | -   | 47  | 1    |
| C <sub>8</sub> H <sub>8</sub> ClO <sub>2</sub>                | 171.0207  | -   | -   | -   | -   | 1   | -   | -   | -   | -   | -   | -   | -   | -   | -   | -   | -   | 1   | 1    |
| <b>C<sub>8</sub>H<sub>6</sub><sup>37</sup>ClO<sub>2</sub></b> | 171.0021  | -   | -   | -   | -   | -   | -   | -   | 2   | -   | -   | -   | -   | -   | -   | -   | -   | 2   | 1    |
| C <sub>7</sub> H <sub>8</sub> Br                              | 170.9804  | -   | -   | -   | -   | -   | -   | 6   | -   | -   | -   | -   | -   | -   | -   | -   | -   | 6   | 1    |
| C <sub>12</sub> H <sub>10</sub> O                             | 170.0727  | -   | -   | -   | 0   | -   | -   | -   | 1   | -   | 0   | -   | -   | -   | -   | 5   | -   | 6   | 1    |
| C <sub>12</sub> H <sub>7</sub> F                              | 170.0526  | -   | -   | 10  | -   | -   | -   | -   | -   | -   | -   | -   | -   | -   | -   | -   | -   | 10  | 1    |
| C <sub>8</sub> H <sub>7</sub> ClO <sub>2</sub>                | 170.0129  | -   | -   | -   | -   | -   | -   | -   | 1   | -   | -   | -   | -   | -   | -   | -   | -   | 1   | 1    |
| C <sub>7</sub> H <sub>7</sub> Br                              | 169.9725  | -   | -   | -   | -   | -   | -   | 2   | -   | -   | -   | -   | -   | -   | -   | -   | -   | 2   | 1    |

| Mol. Form.                                                       | ion (m/z) | ale | bif | cyf | cyh | cpe | cph | del | esf | eto | fen | flu | per | phe | pra | res | tet | sum | #pyr |
|------------------------------------------------------------------|-----------|-----|-----|-----|-----|-----|-----|-----|-----|-----|-----|-----|-----|-----|-----|-----|-----|-----|------|
| C <sub>12</sub> H <sub>9</sub> O                                 | 169.0649  | -   | -   | -   | 3   | 6   | -   | 5   | 5   | 0   | 4   | -   | -   | -   | -   | 1   | -   | 24  | 6    |
| C <sub>11</sub> <sup>13</sup> CH <sub>8</sub> O                  | 169.0604  | -   | -   | -   | 0   | 1   | -   | 1   | -   | 0   | 1   | -   | 2   | -   | -   | -   | -   | 4   | 1    |
| C <sub>10</sub> H <sub>12</sub> <sup>37</sup> Cl                 | 169.0593  | -   | -   | -   | -   | -   | -   | -   | 11  | -   | -   | -   | -   | -   | -   | -   | -   | 11  | 1    |
| C <sub>8</sub> H <sub>6</sub> ClO <sub>2</sub>                   | 169.0051  | -   | -   | -   | -   | -   | -   | -   | 6   | -   | -   | -   | -   | -   | -   | -   | -   | 6   | 1    |
| C <sub>8</sub> H <sub>16</sub> O <sub>2</sub>                    | 168.1145  | 4   | -   | -   | -   | -   | -   | -   | -   | -   | -   | -   | -   | -   | 4   | -   | -   | 4   | 1    |
| C <sub>9</sub> <sup>13</sup> CH <sub>12</sub> Cl                 | 168.0656  | -   | -   | -   | -   | -   | -   | -   | 4   | -   | -   | -   | -   | -   | -   | -   | -   | 4   | 1    |
| C <sub>12</sub> H <sub>8</sub> O                                 | 168.0570  | -   | -   | -   | 3   | 5   | -   | 5   | 3   | 3   | 4   | -   | 13  | 18  | -   | -   | -   | 54  | 8    |
| C <sub>10</sub> H <sub>15</sub> O <sub>2</sub>                   | 167.1067  | 1   | -   | -   | -   | -   | 7   | -   | -   | -   | -   | -   | -   | -   | 1   | -   | -   | 8   | 1    |
| C <sub>13</sub> H <sub>11</sub>                                  | 167.0855  | -   | 1   | -   | -   | -   | -   | 0   | 1   | 0   | 0   | -   | -   | -   | -   | -   | -   | 2   | 1    |
| C <sub>12</sub> <sup>13</sup> CH <sub>10</sub>                   | 167.0811  | -   | 7   | -   | -   | -   | -   | -   | -   | -   | -   | -   | -   | -   | -   | -   | -   | 7   | 1    |
| C <sub>10</sub> H <sub>12</sub> Cl                               | 167.0622  | -   | -   | -   | -   | -   | -   | -   | 36  | -   | -   | -   | -   | -   | -   | -   | -   | 36  | 1    |
| C <sub>7</sub> H <sub>9</sub> <sup>37</sup> Cl <sub>2</sub>      | 167.0017  | -   | -   | -   | -   | 8   | -   | -   | -   | -   | -   | -   | 2   | -   | -   | -   | -   | 9   | 2    |
| C <sub>10</sub> H <sub>14</sub> O <sub>2</sub>                   | 166.0974  | -   | -   | -   | -   | -   | -   | -   | -   | -   | -   | -   | -   | -   | -   | 6   | -   | 6   | 1    |
| C <sub>13</sub> H <sub>10</sub>                                  | 166.0778  | -   | 49  | -   | -   | -   | -   | -   | 0   | -   | 0   | -   | -   | -   | -   | -   | -   | 49  | 1    |
| C <sub>12</sub> <sup>13</sup> CH <sub>9</sub>                    | 166.0738  | -   | 6   | -   | -   | -   | -   | -   | 0   | 0   | 0   | -   | 2   | -   | -   | -   | 0   | 8   | 2    |
| C <sub>6</sub> <sup>13</sup> CH <sub>9</sub> Cl <sup>37</sup> Cl | 166.0080  | -   | -   | -   | -   | 4   | -   | -   | -   | -   | -   | -   | 1   | -   | -   | -   | -   | 4   | 1    |
| C <sub>9</sub> <sup>13</sup> C <sub>2</sub> H <sub>15</sub> O    | 165.1187  | -   | -   | -   | -   | -   | -   | -   | -   | 1   | -   | -   | -   | -   | -   | -   | -   | 1   | 1    |
| C <sub>8</sub> <sup>13</sup> CH <sub>10</sub> NO <sub>2</sub>    | 165.0738  | -   | -   | -   | -   | -   | -   | -   | -   | -   | -   | -   | -   | -   | -   | -   | 10  | 10  | 1    |
| C <sub>13</sub> H <sub>9</sub>                                   | 165.0700  | -   | 45  | -   | 0   | -   | -   | 1   | 1   | 2   | 1   | -   | 12  | -   | -   | -   | -   | 62  | 3    |
| C <sub>7</sub> H <sub>9</sub> Cl <sup>37</sup> Cl                | 165.0047  | -   | -   | 46  | -   | 48  | -   | -   | -   | -   | -   | -   | 10  | -   | -   | -   | -   | 104 | 3    |
| C <sub>10</sub> <sup>13</sup> CH <sub>15</sub> O                 | 164.1151  | -   | -   | -   | -   | -   | -   | -   | -   | 12  | -   | -   | -   | -   | -   | -   | -   | 12  | 1    |
| C <sub>9</sub> H <sub>10</sub> NO <sub>2</sub>                   | 164.0705  | -   | -   | -   | -   | -   | -   | -   | -   | -   | -   | -   | -   | -   | -   | -   | 100 | 100 | 1    |
| C <sub>13</sub> H <sub>8</sub>                                   | 164.0622  | -   | 2   | -   | 0   | -   | -   | -   | -   | 0   | -   | -   | 1   | -   | -   | -   | -   | 3   | 1    |
| C <sub>5</sub> H <sub>7</sub> ClNO <sub>3</sub>                  | 164.0109  | -   | -   | -   | -   | 6   | -   | -   | -   | -   | -   | -   | 1   | -   | -   | -   | -   | 7   | 2    |
| C <sub>11</sub> H <sub>15</sub> O                                | 163.1117  | -   | -   | -   | -   | -   | -   | -   | -   | 100 | -   | -   | -   | -   | -   | -   | -   | 100 | 1    |
| C <sub>7</sub> H <sub>9</sub> Cl <sub>2</sub>                    | 163.0081  | -   | -   | 71  | -   | 73  | -   | -   | -   | -   | -   | -   | 16  | -   | -   | -   | -   | 160 | 3    |
|                                                                  | 162.1040  | -   | -   | -   | -   | -   | -   | -   | -   | 2   | -   | -   | -   | -   | -   | -   | -   | 2   | 1    |
|                                                                  | 162.0606  | -   | 0   | -   | 2   | -   | -   | -   | -   | -   | -   | -   | -   | -   | -   | -   | -   | 2   | 1    |
| C <sub>8</sub> H <sub>8</sub> F <sub>3</sub>                     | 161.0572  | -   | 1   | -   | 22  | -   | -   | -   | -   | -   | -   | -   | -   | -   | -   | -   | -   | 22  | 1    |
|                                                                  | 159.0416  | -   | 0   | -   | 2   | -   | -   | -   | -   | -   | -   | -   | -   | -   | -   | -   | -   | 2   | 1    |

| Mol. Form.                                       | ion (m/z) | ale | bif | cyf | cyh | cpe | cph | del | esf | eto | fen | flu | per | phe | pra | res | tet | sum | #pyr |
|--------------------------------------------------|-----------|-----|-----|-----|-----|-----|-----|-----|-----|-----|-----|-----|-----|-----|-----|-----|-----|-----|------|
|                                                  | 157.0648  | -   | -   | -   | -   | -   | -   | -   | -   | -   | -   | -   | -   | -   | -   | 2   | -   | 2   | 1    |
|                                                  | 155.0855  | -   | -   | -   | 0   | -   | -   | -   | -   | 1   | -   | -   | 7   | -   | -   | -   | -   | 8   | 1    |
|                                                  | 155.0605  | -   | 0   | -   | -   | 1   | -   | -   | 0   | 0   | 1   | -   | 1   | -   | -   | 6   | -   | 10  | 2    |
|                                                  | 154.9870  | -   | 0   | -   | 1   | -   | -   | -   | -   | -   | -   | -   | -   | -   | -   | -   | -   | 1   | 1    |
|                                                  | 154.0778  | -   | 0   | -   | 0   | -   | -   | 0   | 0   | 1   | 0   | -   | 4   | -   | -   | -   | -   | 6   | 1    |
|                                                  | 154.0734  | -   | 1   | -   | 1   | 1   | -   | 1   | 1   | 0   | 1   | -   | 1   | -   | -   | -   | -   | 7   | 4    |
|                                                  | 153.9994  | -   | -   | -   | -   | -   | -   | -   | 7   | -   | -   | -   | -   | -   | -   | -   | -   | 7   | 1    |
| C <sub>9</sub> H <sub>13</sub> O <sub>2</sub>    | 153.0911  | 6   | -   | -   | -   | -   | -   | -   | -   | -   | -   | -   | -   | -   | 7   | -   | -   | 13  | 2    |
| C <sub>12</sub> H <sub>9</sub>                   | 153.0699  | -   | 5   | -   | 6   | 9   | -   | 9   | 6   | 3   | 8   | -   | 12  | 13  | -   | 4   | -   | 74  | 10   |
| C <sub>11</sub> <sup>13</sup> CH <sub>8</sub>    | 153.0656  | -   | 0   | -   | 1   | 3   | -   | 2   | 1   | 0   | 2   | -   | -   | -   | -   | -   | -   | 11  | 5    |
| C <sub>8</sub> H <sub>6</sub> ClO                | 153.0101  | -   | -   | -   | -   | 2   | -   | -   | -   | -   | -   | -   | -   | -   | -   | -   | -   | 2   | 1    |
| C <sub>7</sub> <sup>13</sup> CH <sub>5</sub> ClO | 153.0057  | -   | -   | -   | -   | -   | -   | -   | 2   | -   | -   | -   | -   | -   | -   | -   | -   | 2   | 1    |
| C <sub>12</sub> H <sub>8</sub>                   | 152.0621  | -   | 4   | -   | 12  | 21  | 11  | 20  | 11  | 1   | 19  | 4   | 4   | -   | -   | -   | -   | 107 | 10   |
| C <sub>8</sub> H <sub>5</sub> ClO                | 152.0024  | -   | -   | -   | -   | -   | -   | -   | 22  | -   | -   | -   | -   | -   | -   | -   | -   | 22  | 1    |
|                                                  | 151.0543  | -   | 1   | -   | 2   | 4   | -   | 4   | 3   | 0   | 4   | -   | -   | -   | -   | -   | -   | 17  | 5    |
|                                                  | 150.9526  | -   | -   | -   | -   | 1   | -   | -   | -   | -   | -   | -   | -   | -   | -   | -   | -   | 1   | 1    |
|                                                  | 148.9557  | -   | -   | -   | -   | 2   | -   | -   | -   | -   | -   | -   | -   | -   | -   | -   | -   | 2   | 1    |
|                                                  | 147.0806  | -   | -   | -   | -   | -   | -   | -   | -   | 0   | -   | -   | -   | -   | -   | 2   | 0   | 2   | 1    |
|                                                  | 147.0316  | -   | -   | -   | -   | -   | -   | -   | 1   | -   | -   | -   | -   | -   | -   | -   | -   | 1   | 1    |
|                                                  | 145.0648  | -   | -   | -   | 0   | -   | -   | -   | -   | -   | 0   | -   | -   | -   | -   | 2   | -   | 2   | 1    |
| C <sub>10</sub> <sup>13</sup> CH <sub>11</sub>   | 144.0889  | -   | -   | -   | -   | -   | -   | -   | -   | -   | -   | -   | -   | -   | -   | 12  | -   | 12  | 1    |
| C <sub>11</sub> H <sub>11</sub>                  | 143.0856  | -   | -   | -   | -   | -   | -   | -   | -   | -   | 0   | -   | -   | -   | -   | 99  | -   | 99  | 1    |
| C <sub>7</sub> H <sub>6</sub> <sup>37</sup> ClO  | 143.0073  | -   | -   | -   | -   | -   | -   | -   | 1   | -   | -   | -   | -   | -   | -   | -   | -   | 1   | 1    |
|                                                  | 142.0778  | -   | -   | -   | 0   | -   | -   | -   | 0   | -   | 0   | -   | -   | -   | -   | 5   | -   | 5   | 1    |
|                                                  | 142.0734  | -   | 0   | -   | 0   | 1   | -   | 1   | 1   | 0   | 1   | -   | -   | -   | -   | 3   | -   | 7   | 2    |
|                                                  | 142.0544  | -   | 0   | -   | 3   | -   | -   | -   | -   | -   | -   | -   | -   | -   | -   | -   | -   | 3   | 1    |
| C <sub>8</sub> H <sub>13</sub> O <sub>2</sub>    | 141.0911  | -   | -   | -   | -   | -   | -   | -   | -   | -   | 11  | -   | -   | -   | -   | -   | -   | 11  | 1    |
| C <sub>11</sub> H <sub>9</sub>                   | 141.0700  | -   | 1   | -   | 4   | 8   | -   | 7   | 5   | 0   | 5   | -   | 2   | -   | -   | 26  | -   | 59  | 8    |
| C <sub>8</sub> H <sub>7</sub> F <sub>2</sub>     | 141.0511  | -   | 3   | -   | 33  | -   | -   | -   | -   | -   | -   | -   | -   | -   | -   | -   | -   | 36  | 2    |
| C <sub>8</sub> H <sub>8</sub> <sup>37</sup> Cl   | 141.0280  | -   | -   | -   | -   | -   | -   | -   | 2   | -   | -   | -   | -   | -   | -   | -   | -   | 2   | 1    |

| Mol. Form.                                                                                                                                                            | ion (m/z) | ale | bif | cyf | cyh | cpe | cph | del | esf | eto | fen | flu | per | phe | pra | res | tet | sum | #pyr |
|-----------------------------------------------------------------------------------------------------------------------------------------------------------------------|-----------|-----|-----|-----|-----|-----|-----|-----|-----|-----|-----|-----|-----|-----|-----|-----|-----|-----|------|
| C <sub>7</sub> H <sub>6</sub> ClO                                                                                                                                     | 141.0103  | -   | -   | -   | -   | -   | -   | -   | 4   | -   | -   | -   | -   | -   | -   | -   | -   | 4   | 1    |
|                                                                                                                                                                       | 140.0496  | -   | -   | -   | 1   | 1   | -   | 1   | 1   | -   | 1   | -   | -   | -   | -   | -   | -   | 5   | 2    |
| C <sub>8</sub> H <sub>8</sub> Cl                                                                                                                                      | 139.0544  | -   | 1   | -   | 2   | 3   | -   | 3   | 2   | 0   | 3   | -   | 1   | -   | -   | 2   | -   | 17  | 7    |
|                                                                                                                                                                       | 139.0310  | -   | -   | -   | -   | -   | -   | -   | 6   | -   | -   | -   | -   | -   | -   | -   | -   | 6   | 1    |
|                                                                                                                                                                       | 137.0917  | 2   | -   | -   | -   | -   | -   | -   | -   | -   | -   | -   | -   | -   | -   | -   | -   | 2   | 1    |
|                                                                                                                                                                       | 137.0599  | -   | -   | -   | -   | 1   | -   | 2   | -   | -   | -   | -   | -   | -   | -   | -   | -   | 2   | 1    |
| C <sub>9</sub> H <sub>12</sub> O<br>C <sub>8</sub> <sup>13</sup> CH <sub>11</sub> O                                                                                   | 136.0884  | 25  | -   | -   | -   | -   | -   | -   | -   | -   | -   | -   | -   | -   | -   | -   | -   | 25  | 1    |
|                                                                                                                                                                       | 136.0839  | -   | -   | -   | -   | -   | -   | -   | -   | 3   | -   | -   | -   | -   | -   | -   | -   | 3   | 1    |
| C <sub>9</sub> H <sub>11</sub> O<br>C <sub>8</sub> H <sub>7</sub> O <sub>2</sub>                                                                                      | 135.0805  | 2   | -   | -   | -   | -   | -   | -   | -   | 33  | -   | -   | -   | -   | 1   | -   | -   | 35  | 2    |
|                                                                                                                                                                       | 135.0441  | -   | -   | -   | -   | -   | -   | -   | 0   | -   | -   | -   | -   | -   | -   | -   | 7   | 7   | 1    |
|                                                                                                                                                                       | 134.0728  | 1   | -   | -   | -   | -   | -   | -   | -   | 1   | -   | -   | -   | -   | 9   | -   | -   | 11  | 2    |
|                                                                                                                                                                       | 133.0649  | 2   | -   | -   | -   | -   | -   | -   | -   | 1   | -   | -   | -   | -   | 6   | -   | -   | 9   | 2    |
|                                                                                                                                                                       | 132.0571  | -   | -   | -   | -   | -   | -   | -   | -   | -   | -   | -   | -   | -   | 2   | -   | -   | 2   | 1    |
|                                                                                                                                                                       | 131.0492  | -   | -   | -   | -   | -   | -   | -   | -   | 0   | -   | -   | -   | -   | 2   | -   | -   | 2   | 1    |
|                                                                                                                                                                       | 130.0314  | -   | -   | -   | -   | 2   | -   | -   | -   | -   | -   | -   | -   | -   | -   | -   | -   | 2   | 1    |
| C <sub>10</sub> H <sub>9</sub><br>C <sub>9</sub> <sup>13</sup> CH <sub>8</sub><br>C <sub>7</sub> H <sub>10</sub> Cl<br>C <sub>7</sub> H <sub>8</sub> <sup>37</sup> Cl | 129.0700  | -   | 0   | -   | -   | -   | -   | -   | -   | 1   | 0   | -   | 2   | -   | -   | 4   | -   | 7   | 2    |
|                                                                                                                                                                       | 129.0657  | -   | -   | -   | -   | -   | -   | -   | -   | 0   | -   | -   | -   | -   | -   | 11  | -   | 11  | 1    |
|                                                                                                                                                                       | 129.0467  | -   | -   | -   | -   | 1   | -   | -   | -   | -   | -   | -   | -   | -   | -   | -   | -   | 1   | 1    |
|                                                                                                                                                                       | 129.0281  | -   | -   | 26  | -   | 28  | -   | -   | -   | -   | -   | -   | 5   | -   | -   | -   | -   | 59  | 3    |
| C <sub>10</sub> H <sub>8</sub><br>C <sub>10</sub> H <sub>8</sub><br>C <sub>5</sub> H <sub>6</sub> NO <sub>3</sub><br>C <sub>6</sub> <sup>13</sup> CH <sub>6</sub> Cl  | 128.0621  | -   | 1   | -   | 0   | -   | -   | -   | 1   | 1   | 1   | -   | 3   | -   | -   | 100 | -   | 108 | 4    |
|                                                                                                                                                                       | 128.0388  | -   | -   | -   | 0   | 3   | -   | -   | -   | -   | -   | -   | 1   | -   | -   | -   | -   | 4   | 1    |
|                                                                                                                                                                       | 128.0344  | -   | -   | -   | -   | 7   | -   | -   | -   | -   | -   | -   | 1   | -   | -   | -   | -   | 8   | 2    |
|                                                                                                                                                                       | 128.0157  | -   | -   | -   | -   | -   | -   | -   | 2   | -   | -   | -   | -   | -   | -   | -   | -   | 2   | 1    |
| C <sub>10</sub> H <sub>7</sub><br>C <sub>7</sub> H <sub>5</sub> F <sub>2</sub><br>C <sub>7</sub> H <sub>8</sub> Cl<br>C <sub>7</sub> H <sub>6</sub> <sup>37</sup> Cl  | 127.0543  | -   | 0   | -   | 1   | 1   | -   | 2   | 2   | 1   | 1   | -   | 1   | -   | -   | -   | -   | 8   | 5    |
|                                                                                                                                                                       | 127.0355  | -   | 1   | -   | 2   | -   | -   | -   | -   | -   | -   | -   | -   | -   | -   | -   | -   | 3   | 1    |
|                                                                                                                                                                       | 127.0310  | -   | -   | 77  | -   | 87  | -   | -   | -   | -   | -   | -   | 16  | -   | -   | -   | -   | 180 | 3    |
|                                                                                                                                                                       | 127.0124  | -   | -   | -   | -   | 1   | -   | -   | 32  | -   | -   | -   | -   | -   | -   | -   | -   | 33  | 1    |
| C <sub>7</sub> <sup>13</sup> CH <sub>13</sub> O<br>C <sub>5</sub> H <sub>4</sub> NO <sub>3</sub><br>C <sub>7</sub> H <sub>5</sub> <sup>37</sup> Cl                    | 126.0995  | -   | -   | -   | -   | -   | -   | -   | -   | -   | 2   | -   | -   | -   | -   | -   | -   | 2   | 1    |
|                                                                                                                                                                       | 126.0187  | -   | -   | -   | -   | -   | -   | -   | 7   | -   | -   | -   | -   | -   | -   | -   | -   | 7   | 1    |
|                                                                                                                                                                       | 126.0045  | -   | -   | -   | -   | -   | -   | -   | 1   | -   | -   | -   | -   | -   | -   | -   | -   | 1   | 1    |

| Mol. Form.                                         | ion (m/z) | ale        | bif | cyf | cyh | cpe | cph        | del | esf | eto | fen | flu | per | phe | pra        | res | tet | sum | #pyr |
|----------------------------------------------------|-----------|------------|-----|-----|-----|-----|------------|-----|-----|-----|-----|-----|-----|-----|------------|-----|-----|-----|------|
| C <sub>8</sub> H <sub>13</sub> O                   | 125.0962  | 0          | -   | -   | -   | -   | -          | -   | -   | -   | 28  | -   | -   | -   | 1          | -   | -   | 29  | 1    |
| C <sub>7</sub> H <sub>9</sub> O <sub>2</sub>       | 125.0599  | 1          | -   | -   | -   | -   | -          | -   | -   | -   | 0   | -   | -   | -   | 1          | -   | -   | 3   | 2    |
| C <sub>7</sub> H <sub>6</sub> Cl                   | 125.0154  | -          | -   | -   | -   | 3   | -          | -   | 100 | -   | -   | -   | 1   | -   | -          | -   | -   | 103 | 2    |
| <b>C<sub>8</sub><sup>14</sup>CH<sub>15</sub></b>   | 124.1203  | 10         | -   | -   | -   | -   | 9          | -   | -   | -   | -   | -   | -   | 10  | 10         | 8   | 2   | 49  | 6    |
| C <sub>7</sub> H <sub>5</sub> Cl                   | 124.0075  | -          | -   | -   | -   | -   | -          | -   | 5   | -   | -   | -   | -   | -   | -          | -   | -   | 5   | 1    |
| <b>C<sub>9</sub>H<sub>15</sub></b>                 | 123.1169  | <b>100</b> | -   | -   | -   | -   | <b>100</b> | -   | -   | -   | -   | -   | -   | 96  | <b>100</b> | 85  | 16  | 497 | 6    |
| C <sub>8</sub> H <sub>11</sub> O                   | 123.0805  | -          | -   | -   | -   | -   | -          | -   | -   | -   | 6   | -   | -   | -   | -          | -   | -   | 6   | 1    |
| <b>C<sub>4</sub>H<sub>3</sub>Cl<sup>37</sup>Cl</b> | 122.9576  | -          | -   | -   | -   | 2   | -          | -   | -   | -   | -   | -   | -   | -   | -          | -   | -   | 2   | 1    |
| C <sub>9</sub> H <sub>13</sub>                     | 121.1013  | 5          | -   | -   | -   | -   | 22         | -   | -   | -   | -   | -   | -   | -   | 5          | 4   | 2   | 38  | 5    |
| C <sub>8</sub> H <sub>9</sub> O                    | 121.0649  | 3          | -   | -   | -   | -   | -          | -   | -   | 0   | -   | -   | -   | -   | 1          | 1   | 0   | 6   | 1    |
| C <sub>4</sub> H <sub>3</sub> Cl <sub>2</sub>      | 120.9606  | -          | -   | -   | -   | 2   | -          | -   | -   | -   | -   | -   | -   | -   | -          | -   | -   | 2   | 1    |
|                                                    | 119.0605  | -          | -   | -   | -   | 4   | -          | -   | -   | -   | -   | -   | -   | -   | -          | -   | -   | 4   | 1    |
|                                                    | 119.0492  | 2          | -   | -   | -   | -   | -          | -   | -   | 1   | -   | -   | -   | -   | 2          | -   | -   | 5   | 2    |
|                                                    | 118.9315  | -          | -   | -   | -   | -   | -          | 3   | -   | -   | -   | -   | -   | -   | -          | -   | -   | 3   | 1    |
|                                                    | 117.0699  | -          | -   | -   | -   | -   | -          | -   | 4   | 0   | -   | -   | -   | -   | -          | 6   | -   | 10  | 2    |
|                                                    | 116.9335  | -          | -   | -   | -   | -   | -          | 4   | -   | -   | -   | -   | -   | -   | -          | -   | -   | 4   | 1    |
|                                                    | 116.0621  | 0          | -   | -   | 0   | -   | -          | -   | 2   | 0   | 0   | -   | -   | -   | -          | -   | -   | 3   | 1    |
|                                                    | 116.0578  | -          | 0   | -   | 0   | 1   | -          | 1   | 1   | 0   | 1   | -   | -   | -   | -          | 3   | -   | 6   | 2    |
|                                                    | 116.0496  | -          | -   | -   | 1   | 3   | -          | 3   | 1   | -   | 3   | -   | -   | -   | -          | -   | -   | 12  | 5    |
| C <sub>9</sub> H <sub>7</sub>                      | 115.0544  | -          | 1   | -   | 4   | 7   | -          | 6   | 12  | 2   | 6   | -   | 5   | -   | -          | 28  | -   | 71  | 9    |
| C <sub>8</sub> H <sub>5</sub> N                    | 115.0418  | -          | -   | -   | 1   | 1   | -          | 1   | 1   | -   | 1   | -   | -   | -   | -          | -   | -   | 5   | 3    |
| C <sub>6</sub> H <sub>8</sub> Cl                   | 115.0310  | -          | -   | -   | -   | 1   | -          | -   | -   | -   | -   | -   | -   | -   | -          | -   | -   | 1   | 1    |
|                                                    | 114.0339  | -          | -   | -   | 3   | 5   | -          | 5   | 3   | -   | 5   | -   | -   | -   | -          | -   | -   | 20  | 5    |
|                                                    | 113.0962  | -          | -   | -   | -   | -   | -          | -   | -   | -   | 2   | -   | -   | -   | -          | -   | -   | 2   | 1    |
|                                                    | 113.0917  | -          | -   | -   | -   | -   | -          | -   | 2   | -   | -   | -   | -   | -   | -          | -   | -   | 2   | 1    |
|                                                    | 113.0153  | -          | -   | -   | 0   | 1   | -          | -   | 2   | -   | -   | -   | -   | -   | -          | -   | -   | 3   | 2    |
|                                                    | 110.9577  | -          | -   | -   | -   | 3   | -          | -   | -   | -   | -   | -   | -   | -   | -          | -   | -   | 3   | 1    |
|                                                    | 110.1091  | -          | -   | -   | -   | -   | -          | -   | -   | -   | -   | -   | -   | -   | -          | 2   | -   | 2   | 1    |
|                                                    | 109.0649  | 1          | -   | -   | -   | 1   | -          | 2   | -   | -   | 1   | -   | -   | -   | 1          | 1   | 0   | 8   | 4    |
|                                                    | 108.9609  | -          | -   | -   | -   | 5   | -          | -   | -   | -   | -   | -   | 1   | -   | -          | -   | -   | 6   | 1    |

| Mol. Form.                                   | ion (m/z) | ale | bif | cyf | cyh | cpe | cph | del | esf | eto | fen | flu | per | phe | pra | res | tet | sum | #pyr |
|----------------------------------------------|-----------|-----|-----|-----|-----|-----|-----|-----|-----|-----|-----|-----|-----|-----|-----|-----|-----|-----|------|
|                                              | 108.0934  | 1   | -   | -   | -   | -   | -   | -   | -   | -   | -   | -   | -   | -   | -   | -   | -   | 1   | 1    |
|                                              | 108.0889  | 1   | -   | -   | -   | -   | -   | -   | -   | -   | -   | -   | -   | -   | -   | -   | -   | 1   | 1    |
|                                              | 108.0571  | 6   | -   | -   | -   | -   | -   | -   | -   | -   | -   | -   | -   | -   | -   | -   | 1   | 6   | 1    |
|                                              | 108.0525  | -   | -   | -   | -   | -   | -   | -   | -   | 1   | -   | -   | -   | -   | -   | -   | 1   | 2   | 1    |
| C <sub>8</sub> H <sub>11</sub>               | 107.0856  | 11  | -   | -   | -   | -   | -   | -   | -   | 0   | -   | -   | -   | -   | 4   | 3   | 2   | 19  | 4    |
| C <sub>7</sub> H <sub>7</sub> O              | 107.0492  | 1   | -   | -   | -   | -   | -   | -   | -   | 17  | -   | -   | -   | -   | -   | -   | 9   | 27  | 3    |
|                                              | 106.0777  | 0   | -   | -   | -   | -   | -   | -   | -   | 0   | -   | -   | -   | -   | 2   | -   | -   | 2   | 1    |
|                                              | 106.0733  | 1   | -   | -   | -   | -   | -   | -   | -   | -   | -   | -   | -   | -   | 2   | -   | -   | 3   | 1    |
| C <sub>8</sub> H <sub>9</sub>                | 105.0700  | 9   | -   | -   | -   | -   | -   | -   | -   | 1   | -   | -   | -   | -   | 19  | 2   | 1   | 32  | 3    |
|                                              | 104.0621  | -   | -   | -   | -   | -   | -   | -   | -   | -   | -   | -   | -   | -   | 2   | -   | -   | 2   | 1    |
|                                              | 104.0577  | -   | -   | -   | -   | -   | -   | 0   | -   | -   | -   | -   | -   | -   | 1   | -   | -   | 1   | 1    |
| C <sub>8</sub> H <sub>7</sub>                | 103.0544  | 2   | -   | -   | -   | -   | -   | 2   | -   | 0   | -   | -   | -   | -   | 12  | 1   | -   | 18  | 4    |
|                                              | 103.0417  | -   | -   | -   | 0   | 1   | -   | 1   | -   | -   | 1   | -   | -   | -   | -   | -   | -   | 3   | 1    |
|                                              | 102.0465  | -   | 0   | -   | 0   | -   | -   | 0   | -   | 0   | 0   | -   | -   | -   | 1   | 1   | -   | 3   | 1    |
|                                              | 98.9997   | -   | -   | -   | -   | 1   | -   | 1   | -   | -   | -   | -   | -   | -   | -   | -   | -   | 2   | 1    |
|                                              | 98.1046   | -   | -   | -   | -   | -   | -   | -   | -   | -   | 3   | -   | -   | -   | -   | -   | -   | 3   | 1    |
| C <sub>7</sub> H <sub>13</sub>               | 97.1012   | -   | -   | -   | -   | -   | -   | -   | -   | -   | 47  | -   | -   | -   | -   | -   | -   | 47  | 1    |
| C <sub>7</sub> H <sub>11</sub>               | 95.0856   | 10  | -   | -   | -   | -   | 10  | -   | -   | -   | 9   | -   | -   | -   | 11  | 11  | 2   | 52  | 6    |
| C <sub>6</sub> H <sub>7</sub> O              | 95.0492   | 1   | -   | -   | 0   | 1   | -   | 1   | -   | 3   | 1   | -   | -   | -   | 1   | -   | 0   | 8   | 4    |
| C <sub>7</sub> H <sub>10</sub>               | 94.0778   | 0   | -   | -   | -   | -   | -   | 9   | -   | -   | -   | -   | -   | -   | -   | -   | -   | 10  | 1    |
| C <sub>6</sub> <sup>13</sup> CH <sub>9</sub> | 94.0733   | 1   | -   | -   | -   | -   | -   | 2   | -   | -   | -   | -   | -   | -   | -   | -   | 0   | 4   | 2    |
| C <sub>7</sub> H <sub>9</sub>                | 93.0700   | 17  | 0   | -   | 1   | 5   | -   | 31  | -   | 0   | 1   | -   | 1   | -   | -   | 4   | 4   | 63  | 5    |
| C <sub>7</sub> H <sub>8</sub>                | 92.0621   | 1   | -   | -   | -   | -   | -   | 10  | -   | -   | -   | -   | -   | -   | 1   | -   | -   | 12  | 2    |
| C <sub>6</sub> <sup>13</sup> CH <sub>7</sub> | 92.0577   | 2   | 0   | -   | 0   | 4   | -   | 2   | -   | 0   | -   | -   | 1   | -   | 1   | 1   | 0   | 12  | 4    |
| C <sub>7</sub> H <sub>7</sub>                | 91.0543   | 33  | 1   | 47  | 4   | 56  | 3   | 25  | -   | 2   | 1   | -   | 11  | 10  | 10  | 17  | 3   | 220 | 12   |
|                                              | 89.0387   | 0   | 1   | -   | 1   | 2   | -   | 2   | 8   | 2   | 1   | -   | 4   | -   | 1   | 2   | -   | 24  | 7    |
|                                              | 88.0308   | -   | 0   | -   | 1   | 2   | -   | 1   | 1   | -   | 1   | -   | -   | -   | -   | -   | -   | 6   | 2    |
|                                              | 86.9996   | -   | -   | -   | -   | 1   | -   | -   | -   | -   | -   | -   | -   | -   | -   | -   | -   | 1   | 1    |
|                                              | 84.9839   | -   | -   | -   | -   | 2   | -   | -   | -   | -   | -   | -   | 1   | -   | -   | -   | -   | 3   | 1    |
|                                              | 84.0934   | -   | -   | -   | -   | -   | -   | -   | -   | -   | 5   | -   | -   | -   | -   | -   | -   | 5   | 1    |

| Mol. Form.                      | ion (m/z) | ale | bif | cyf | cyh | cpe | cph | del | esf | eto | fen | flu | per | phe | pra | res | tet | sum | #pyr |
|---------------------------------|-----------|-----|-----|-----|-----|-----|-----|-----|-----|-----|-----|-----|-----|-----|-----|-----|-----|-----|------|
| C <sub>6</sub> H <sub>11</sub>  | 83.0856   | -   | -   | -   | -   | -   | -   | -   | -   | 0   | 1   | -   | -   | -   | -   | -   | -   | 1   | 1    |
| C <sub>5</sub> H <sub>7</sub> O | 83.0492   | 1   | -   | -   | 1   | 2   | -   | 2   | -   | -   | 13  | -   | -   | -   | 1   | -   | -   | 19  | 4    |
| CHCl <sub>2</sub>               | 82.9449   | -   | -   | -   | -   | 1   | -   | -   | -   | -   | -   | -   | -   | -   | -   | -   | -   | 1   | 1    |
|                                 | 82.0733   | 4   | -   | -   | -   | -   | -   | -   | 1   | -   | 0   | -   | -   | -   | 3   | 3   | 1   | 12  | 3    |
|                                 | 81.9236   | -   | -   | -   | -   | -   | -   | 4   | -   | -   | -   | -   | -   | -   | -   | -   | -   | 4   | 1    |
| C <sub>6</sub> H <sub>9</sub>   | 81.0699   | 56  | -   | -   | -   | -   | 46  | -   | -   | -   | 3   | -   | -   | 38  | 52  | 50  | 10  | 256 | 7    |
|                                 | 80.0621   | -   | -   | -   | 0   | -   | -   | 1   | -   | -   | 0   | -   | -   | -   | -   | -   | -   | 1   | 1    |
|                                 | 80.0576   | 3   | -   | -   | -   | -   | -   | 1   | -   | 0   | 0   | -   | -   | -   | 2   | 1   | 1   | 7   | 2    |
|                                 | 79.9256   | -   | -   | -   | -   | -   | -   | 3   | -   | -   | -   | -   | -   | -   | -   | -   | -   | 3   | 1    |
| C <sub>6</sub> H <sub>7</sub>   | 79.0543   | 49  | 0   | -   | 1   | -   | 8   | -   | -   | 1   | 3   | -   | 1   | -   | 23  | 11  | 7   | 103 | 6    |
|                                 | 78.0465   | 2   | -   | -   | 1   | -   | -   | -   | -   | 1   | 1   | -   | 1   | -   | 3   | 1   | 0   | 9   | 3    |
|                                 | 78.0420   | -   | -   | -   | 0   | 1   | -   | -   | 1   | 0   | 1   | -   | -   | -   | 1   | -   | 0   | 4   | 1    |
| C <sub>6</sub> H <sub>5</sub>   | 77.0387   | 16  | 1   | -   | 6   | 15  | -   | 19  | 8   | 4   | 9   | -   | 3   | 13  | 16  | 5   | 4   | 118 | 13   |
|                                 | 76.0309   | -   | 1   | -   | 1   | 2   | -   | -   | 1   | 0   | 2   | -   | -   | -   | -   | -   | -   | 8   | 4    |
|                                 | 75.0230   | -   | 0   | -   | 1   | 2   | -   | -   | 1   | -   | 1   | -   | -   | -   | -   | -   | -   | 4   | 1    |
|                                 | 74.9810   | -   | -   | -   | -   | 1   | -   | -   | -   | -   | -   | -   | -   | -   | -   | -   | -   | 1   | 1    |
|                                 | 72.9841   | -   | -   | -   | 0   | 3   | -   | -   | 0   | -   | -   | -   | -   | -   | -   | -   | -   | 3   | 1    |
